# Supplementary material
Source: publisher figshare collection journal article supplement (https://tandf.figshare.com/ndownloader/files/31387059)
Supplement: Supplementary file 1 [file 31387059]

# The Outer Product of Gradient Estimation in High Dimensions and its Application

## Technical Proofs

Zhibo Cai, Yingcun Xia and Weiqiang Hang

National University of Singapore

### S.1. Justification of Assumption (A1)

As stated in the discussion of Appendix A.1, the following proposition and remarks show that the condition in (A1) is satisfied in many cases.

**Proposition 1.** *In model (2.1), suppose  $Y = m(\mathbf{X}) + \varepsilon = g(B_0^\top \mathbf{X}) + \varepsilon$  where  $\varepsilon \perp \mathbf{X}$ , and  $\nabla g(\cdot)$  is bounded, and  $B_0 : p \times d$  is the dimension reduction directions. Assuming that  $\mathbf{X}$  has a compact support and it is block-wise independence in the sense that  $X^{[i]}$  and  $X^{[j]}$  are independent when  $|i - j| > T$  for some positive integer  $T$ . Suppose the distance variances  $d\text{Var}(X^{[j]})$  are bounded away from 0, i.e.  $\min\{d\text{Var}(X^{[1]}), \dots, d\text{Var}(X^{[p]})\} > c$  for some positive constant  $c$ . Then, there exists  $\gamma$  such that*

$$\alpha_1 + \alpha_2 + \dots + \alpha_p \leq \gamma,$$

where  $\gamma = \gamma(d)$  is only related to  $d$ .

PROOF OF PROPOSITION 1. For notation simplicity, we consider  $X^{[T+1]}$  as an example. Let  $\mathbf{X}_1^{[T+1]} = (X^{[1]}, \dots, X^{[2T+1]})$  and  $\mathbf{X}_2^{[T+1]} = (X^{[2T+2]}, \dots, X^{[p]})$ , the Taylor's series of  $m(\mathbf{X})$  with a mean-value form remainder is

$$m(\mathbf{X}) = \mathbf{X}_1^{[T+1]} \frac{\partial m(\mathbf{x})}{\partial \mathbf{x}_1^{[T+1]}} \Big|_{\mathbf{x}=(\tilde{\mathbf{X}}_1^{[T+1]}, \mathbf{X}_2^{[T+1]})} + m(\mathbf{0}, \mathbf{X}_2^{[T+1]}) := Z_1 + Z_2, \quad (\text{S.1})$$

where  $\tilde{\mathbf{X}}_1^{[T+1]}$  is a point between  $\mathbf{0}$  and  $\mathbf{X}_1^{[T+1]}$ . It is obvious that  $Z_2$  is independent with  $X^{[T+1]}$

by the block-wise independence condition. Since  $\mathbf{X}$  has a compact support, and  $\nabla g(\cdot)$  is bounded,

$$\begin{aligned}
|Z_1| &\leq \sum_{i=1}^{2T+1} |X^{[i]} \beta^{[i]} \nabla g(B_0^\top (\tilde{\mathbf{X}}_1^{[T+1]}, \mathbf{X}_2^{[T+1]})^\top)| \\
&\leq \sum_{i=1}^{2T+1} |X^{[i]}| \|\beta^{[i]}\| \|\nabla g(B_0^\top (\tilde{\mathbf{X}}_1^{[T+1]}, \mathbf{X}_2^{[T+1]})^\top)\| \\
&\leq A_1 A_2 \sum_{i=1}^{2T+1} \|\beta^{[i]}\|, \quad \text{almost surely}
\end{aligned} \tag{S.2}$$

where  $A_1 = \sup_{\mathbf{v} \in \mathbb{R}^q} \|\nabla g(\mathbf{v})\|$  and  $\sup_i |X^{[i]}| \leq A_2$  almost surely.

By the definition of  $R_{T+1}$  given in (2.5), we can denote it by  $R_{T+1} = Y - c_{T+1} \cdot X^{[T+1]}$ , where  $c_{T+1} = \text{Cov}(X^{[T+1]}, Y) / \sqrt{\text{Var}(X^{[T+1]})}$ . We have

$$\begin{aligned}
\text{Cov}(X^{[T+1]}, Y) &= \text{Cov}(X^{[T+1]}, m(\mathbf{X}) + \epsilon) = \text{Cov}(X^{[T+1]}, Z_1 + Z_2 + \epsilon) \\
&= \text{Cov}(X^{[T+1]}, Z_1) = \mathbf{E}(X^{[T+1]} \cdot Z_1) - \mathbf{E}(X^{[T+1]}) \cdot \mathbf{E}(Z_1).
\end{aligned}$$

Therefore, by (S.2),

$$|\text{Cov}(X^{[T+1]}, Y)| \leq |\mathbf{E}(X^{[T+1]} \cdot Z_1)| + |\mathbf{E}(X^{[T+1]}) \cdot \mathbf{E}(Z_1)| \leq 2A_1 A_2^2 \sum_{i=1}^{2T+1} \|\beta^{[i]}\|.$$

We can conclude by the conditions that

$$c_{T+1} \leq A_3 \sum_{i=1}^{2T+1} \|\beta^{[i]}\|. \tag{S.3}$$

Denote the characteristic function of any random variable  $U$  by  $\varphi_U(t) = \mathbf{E}[e^{\sqrt{-1}tU}]$ , then

$$\begin{aligned}
& \left| \varphi_{X^{[T+1]}, Y - c_{T+1} \cdot X^{[T+1]}}(s, t) - \varphi_{X^{[T+1]}}(s) \varphi_{Y - c_{T+1} \cdot X^{[T+1]}}(t) \right|^2 \\
&= \left| \varphi_{X^{[T+1]}, Z_1 + Z_2 + \epsilon - c_{T+1} \cdot X^{[T+1]}}(s, t) - \varphi_{X^{[T+1]}}(s) \varphi_{Z_1 + Z_2 + \epsilon - c_{T+1} \cdot X^{[T+1]}}(t) \right|^2 \\
&= \left| \varphi_\epsilon(t) \right|^2 \left| \varphi_{X^{[T+1]}, Z_1 + Z_2 - c_{T+1} \cdot X^{[T+1]}}(s, t) - \varphi_{X^{[T+1]}}(s) \varphi_{Z_1 + Z_2 - c_{T+1} \cdot X^{[T+1]}}(t) \right|^2 \\
&\leq \left| \varphi_{X^{[T+1]}, Z_1 + Z_2 - c_{T+1} \cdot X^{[T+1]}}(s, t) - \varphi_{X^{[T+1]}}(s) \varphi_{Z_1 + Z_2 - c_{T+1} \cdot X^{[T+1]}}(t) \right|^2 \\
&\leq 2 \left| \varphi_{X^{[T+1]}, Z_1 + Z_2 - c_{T+1} \cdot X^{[T+1]}}(s, t) - \varphi_{X^{[T+1]}, Z_2}(s, t) \right|^2 \\
&\quad + 2 \left| \varphi_{X^{[T+1]}, Z_2}(s, t) - \varphi_{X^{[T+1]}}(s) \varphi_{Z_1 + Z_2 - c_{T+1} \cdot X^{[T+1]}}(t) \right|^2 \\
&= 2 \left| \mathbf{E} \left[ e^{\sqrt{-1}(sX^{[T+1]} + tZ_2)} (e^{\sqrt{-1}t(Z_1 - c_{T+1} \cdot X^{[T+1]})} - 1) \right] \right|^2 \\
&\quad + 2 \left| \varphi_{X^{[T+1]}}(s) \right|^2 \left| \mathbf{E} \left[ e^{\sqrt{-1}tZ_2} (e^{\sqrt{-1}t(Z_1 - c_{T+1} \cdot X^{[T+1]})} - 1) \right] \right|^2 \\
&\leq 2 \mathbf{E} \left| e^{\sqrt{-1}(sX^{[T+1]} + tZ_2)} (e^{\sqrt{-1}t(Z_1 - c_{T+1} \cdot X^{[T+1]})} - 1) \right|^2 \\
&\quad + 2 \left| \varphi_{X^{[T+1]}}(s) \right|^2 \mathbf{E} \left| e^{\sqrt{-1}tZ_2} \right|^2 \mathbf{E} \left| e^{\sqrt{-1}t(Z_1 - c_{T+1} \cdot X^{[T+1]})} - 1 \right|^2 \\
&= 2 \mathbf{E} \left| e^{\sqrt{-1}t(Z_1 - c_{T+1} \cdot X^{[T+1]})} - 1 \right|^2 + 2 \left| \varphi_{X^{[T+1]}}(s) \right|^2 \mathbf{E} \left| e^{\sqrt{-1}t(Z_1 - c_{T+1} \cdot X^{[T+1]})} - 1 \right|^2.
\end{aligned} \tag{S.4}$$

By (S.2) and (S.3), there exists a constant  $A_4 > 0$  such that

$$|Z_1 - c_{T+1} \cdot X^{[T+1]}| \leq A_4 \sum_{i=1}^{2T+1} \|\beta^{[i]}\|. \quad (\text{S.5})$$

Then, using (S.4) and (S.5) and the definition of distance covariance (Székely et al., 2007), there is a constant  $A_5$  such that

$$dCov^2(R_{T+1}, X^{[T+1]}) \leq A_5 \left( \sum_{i=1}^{2T+1} \|\beta^{[i]}\| \right)^2.$$

By the condition of distance variance, we have

$$dCor^2(R_{T+1}, X^{[T+1]}) \leq A_6 \left( \sum_{i=1}^{2T+1} \|\beta^{[i]}\| \right)^2 \leq A_6 \cdot (2T+1) \sum_{i=1}^{2T+1} \|\beta^{[i]}\|^2,$$

for some positive constant  $A_6$ . Moreover, note that all the constants mentioned above are uniform for  $j = 1, 2, \dots, p$ , we have

$$\begin{aligned} \alpha_1 + \alpha_2 + \dots + \alpha_p &= \sum_{j=1}^p dCor^2(X^{[j]}, R_j) \\ &\leq \sum_{j=1}^p A_6 (2T+1) \sum_{i=j-T}^{j+T} \|\beta^{[i]}\|^2 \\ &= A_6 (2T+1) \sum_{i=j-T}^{j+T} \sum_{j=1}^p \|\beta^{[i]}\|^2 \\ &= A_6 (2T+1)^2 d. \end{aligned}$$

Therefore, the statement follows by selecting  $\gamma_0 = A_6 (2T+1)^2 d$ .  $\square$

**Remark 1.** The block-wise independence can also be extended to serial dependence with appropriate decreasing rate as commonly used in time series analysis, such as  $\alpha$ -mixing assumption; see Fan and Yao (2008). In addition,  $\gamma$  can be proportional to  $d$  under these conditions. Thus,  $d = o(\log(n))$  by condition (A1), which means that the reduced dimension  $d$  is also able to diverge but should has a sub-logarithm rate.

## S.2. Proofs of Theorems 1 and Theorem 2

We first consider the partial derivatives of regression function  $m(\cdot)$ . Since the first and second order partial derivatives of function  $g(\cdot)$  are bounded under Assumption (A2), the partial derivatives of  $m(\cdot)$  will be controlled by the coefficients in  $B_0$ .

**Lemma 1.** Under conditions (A2), we have for  $1 \leq j, k \leq p$ ,

$$\begin{aligned} \sup_{\mathbf{x} \in \mathbb{R}^p} \left| \frac{\partial m(\mathbf{x})}{\partial x^{[j]}} \right| &= O(\|\beta^{[j]}\|), \\ \sup_{\mathbf{x} \in \mathbb{R}^p} \left| \frac{\partial^2 m(\mathbf{x})}{\partial x^{[j]} \partial x^{[k]}} \right| &= O(\|\beta^{[j]}\| \cdot \|\beta^{[k]}\|). \end{aligned}$$

PROOF OF LEMMA 1. The first order partial derivative with respect to  $x^{[j]}$  is

$$\sup_{\mathbf{x} \in \mathbb{R}^p} \left| \frac{\partial m(\mathbf{x})}{\partial x^{[j]}} \right| = \sup_{\mathbf{x} \in \mathbb{R}^p} |[\beta^{[j]}]^\top \nabla g(B_0^\top \mathbf{x})| \leq \sup_{\mathbf{x} \in \mathbb{R}^p} \|\beta^{[j]}\| \|\nabla g(B_0^\top \mathbf{x})\| = O(\|\beta^{[j]}\|), \quad (\text{S.6})$$

where  $\nabla g(B_0^\top \mathbf{x})$  is the gradient of  $g(\cdot)$  at point  $B_0^\top \mathbf{x}$ . In (S.6), the inequality holds by Cauchy-Schwartz inequality, and the last equation holds by Condition (A2). Similarly,

$$\begin{aligned} \sup_{\mathbf{x} \in \mathbb{R}^p} \left| \frac{\partial^2 m(\mathbf{x})}{\partial x^{[j]} \partial x^{[k]}} \right| &= \sup_{\mathbf{x} \in \mathbb{R}^p} |[\beta^{[j]}]^\top \mathcal{H}_g(B_0^\top \mathbf{x}) \beta^{[k]}| \\ &\leq \sup_{\mathbf{x} \in \mathbb{R}^p} \|\beta^{[j]}\| \|\mathcal{H}_g(B_0^\top \mathbf{x}) \beta^{[k]}\| \leq \|\beta^{[j]}\| \|\beta^{[k]}\| \sup_{\mathbf{x} \in \mathbb{R}^p} \|\mathcal{H}_g(B_0^\top \mathbf{x})\| \\ &= O(\|\beta^{[j]}\| \cdot \|\beta^{[k]}\|), \end{aligned} \quad (\text{S.7})$$

where  $\mathcal{H}_g(B_0^\top \mathbf{x})$  is the Hessian matrix of  $g(\cdot)$  at point  $B_0^\top \mathbf{x}$ , and  $\|\mathcal{H}_g(B_0^\top \mathbf{x})\|$  represents its largest eigenvalue. In (S.7), the first inequality holds by Cauchy-Schwartz inequality, while the second inequality holds because of the property of eigenvalue.  $\square$

For ease of exposition, we introduce the following notations. A local approximation of  $m(\mathbf{z})$  by a polynomial of total order  $r$  is given as

$$m(\mathbf{z}) \approx \sum_{0 \leq |\mathbf{k}| \leq r} \frac{1}{\mathbf{k}!} (D^{\mathbf{k}} m)(\mathbf{x}) (\mathbf{z} - \mathbf{x})^{\mathbf{k}}, \quad (\text{S.8})$$

where

$$\begin{aligned} \mathbf{k} &= (k^{[1]}, \dots, k^{[p]}), \mathbf{k}! = k^{[1]}! \times \dots \times k^{[p]}!, |\mathbf{k}| = \sum_{j=1}^p k^{[j]}, \\ \mathbf{x}^{\mathbf{k}} &= (x^{[1]})^{k^{[1]}} \times \dots \times (x^{[p]})^{k^{[p]}}, \sum_{0 \leq |\mathbf{k}| \leq r} = \sum_{j=0}^r \sum_{k^{[1]}=0}^j \dots \sum_{k^{[1]}+\dots+k^{[p]}=j}^j; \end{aligned}$$

and

$$(D^{\mathbf{k}} m)(\mathbf{x}) = \left. \frac{\partial^{\mathbf{k}} m(\mathbf{y})}{\partial (y^{[1]})^{k^{[1]}} \dots \partial (y^{[p]})^{k^{[p]}}} \right|_{\mathbf{y}=\mathbf{x}}.$$

By linear regression and distance correlation estimation (Székely et al., 2007),  $\hat{\alpha} \rightarrow \alpha$  and the rate of convergence is  $O_p(n^{-1/2})$ . Then, by condition (A3)

$$\begin{aligned} |K_h(\mathbf{x}; \hat{\alpha}) - K_h(\mathbf{x}; \alpha)| &\leq C \cdot \left\| \left( \frac{x^{[1]}}{h^{\hat{\alpha}_1}}, \dots, \frac{x^{[p]}}{h^{\hat{\alpha}_p}} \right) - \left( \frac{x^{[1]}}{h^{\alpha_1}}, \dots, \frac{x^{[p]}}{h^{\alpha_p}} \right) \right\| \\ &= C \cdot \left\| \left( \frac{h^{\alpha_1 - \hat{\alpha}_1} - 1}{h^{\alpha_1}} x^{[1]}, \dots, \frac{h^{\alpha_p - \hat{\alpha}_p} - 1}{h^{\alpha_p}} x^{[p]} \right) \right\| \\ &= O_p\left(\frac{-\log(h)}{h\sqrt{n}} \cdot \|\mathbf{x}\|\right), \end{aligned} \quad (\text{S.9})$$

where the last equation holds because of  $\hat{\alpha}_j - \alpha_j = O_p(n^{-1/2})$  and  $h^{\alpha_j} \geq h$  for all  $j$ . The estimation problem can be written as minimizing

$$\sum_{i=1}^n \left[ Y_i - \sum_{0 \leq |\mathbf{k}| \leq 1} b_{\mathbf{k}}(\mathbf{x})(\mathbf{X}_i - \mathbf{x})^{\mathbf{k}} \right]^2 K_h(\mathbf{X}_i - \mathbf{x}; \hat{\alpha}) \quad (\text{S.10})$$

with respect to  $b_{\mathbf{k}}(\mathbf{x})$ . Denote the minimizer of (S.10) by  $\hat{b}_{\mathbf{k}}(\mathbf{x})$ , then we have estimation  $(\widehat{D^{\mathbf{k}}m})(\mathbf{x}) = \mathbf{k}! \hat{b}_{\mathbf{k}}(\mathbf{x})$ . The minimization of (S.10) leads to the set of equations

$$t_{\mathbf{j}}(\mathbf{x}) = \sum_{0 \leq |\mathbf{k}| \leq 1} h^{\mathbf{k} \cdot \alpha} \hat{b}_{\mathbf{k}}(\mathbf{x}) s_{\mathbf{j}+\mathbf{k}}(\mathbf{x}), \quad 0 \leq |\mathbf{j}| \leq 1, \quad (\text{S.11})$$

where

$$\begin{aligned} t_{\mathbf{j}}(\mathbf{x}) &= \frac{1}{n} \sum_{i=1}^n Y_i [\mathbf{Z}_i(h; \alpha) - \mathbf{z}(h; \alpha)]^{\mathbf{j}} K_h(\mathbf{X}_i - \mathbf{x}; \hat{\alpha}), \\ s_{\mathbf{j}}(\mathbf{x}) &= \frac{1}{n} \sum_{i=1}^n [\mathbf{Z}_i(h; \alpha) - \mathbf{z}(h; \alpha)]^{\mathbf{j}} K_h(\mathbf{X}_i - \mathbf{x}; \hat{\alpha}), \end{aligned} \quad (\text{S.12})$$

with

$$\mathbf{z}(h; \alpha) = \left( \frac{x^{[1]}}{h^{\alpha_1}}, \dots, \frac{x^{[p]}}{h^{\alpha_p}} \right). \quad (\text{S.13})$$

Define  $\tau(\mathbf{x}) = (\tau_0(\mathbf{x}), \dots, \tau_p(\mathbf{x}))^\top$ , where  $\tau_0(\mathbf{x}) = t_{(0, \dots, 0)}(\mathbf{x})$ ,  $\tau_1(\mathbf{x}) = t_{(1, \dots, 0)}(\mathbf{x})$ ,  $\dots$ ,  $\tau_p(\mathbf{x}) = t_{(0, \dots, 1)}(\mathbf{x})$ . Arranging  $h^{\mathbf{k} \cdot \alpha} \hat{b}_{\mathbf{k}}(\mathbf{x})$ ,  $0 \leq |\mathbf{k}| \leq 1$  in the same order, we can obtain  $\hat{\theta}$  as an estimator of column vector  $\theta(\mathbf{x}) = (\theta_0(\mathbf{x}), \dots, \theta_p(\mathbf{x}))^\top := (m(\mathbf{x}), h^{\alpha_1} m^{[1]}(\mathbf{x}), \dots, h^{\alpha_p} m^{[p]}(\mathbf{x}))^\top$ . Then, let  $\mathbf{S}(\mathbf{x})$  be a  $(p+1) \times (p+1)$  matrix, where the  $(k, l)$  entry is  $s_{\mathbf{j}}(\mathbf{x})$  with  $(k-1)$ -th and  $(l-1)$ -th elements in  $\mathbf{j}$  are 1 for  $1 \leq k, l \leq p$  and  $k \neq l$ . Other entries in  $\mathbf{S}(\mathbf{x})$  can be obtained similarly. Thus, the set of equations in (S.11) can be written in matrix as

$$\tau(\mathbf{x}) = \mathbf{S}(\mathbf{x}) \hat{\theta}(\mathbf{x}).$$

Since  $\mathbf{S}(\mathbf{x})$  is positive semi-definite when  $K(\cdot) > 0$ , we can henceforth assume the matrix is invertible and write

$$\hat{\theta}(\mathbf{x}) = \mathbf{S}^{-1}(\mathbf{x})\tau(\mathbf{x}),$$

as the solution of the set of equations (S.11).

A fundamental decomposition for the error  $\hat{\theta}(\mathbf{x}) - \theta(\mathbf{x})$  is provided next. Firstly, let

$$t_{\mathbf{j}}^*(\mathbf{x}) = \frac{1}{n} \sum_{i=1}^n [Y_i - m(\mathbf{X}_i)] [\mathbf{Z}_i(h; \boldsymbol{\alpha}) - \mathbf{z}(h; \boldsymbol{\alpha})]^{\mathbf{j}} K_h(\mathbf{X}_i - \mathbf{x}; \hat{\boldsymbol{\alpha}}), \quad (\text{S.14})$$

we have

$$t_{\mathbf{j}}(\mathbf{x}) - t_{\mathbf{j}}^*(\mathbf{x}) = \frac{1}{n} \sum_{i=1}^n m(\mathbf{X}_i) [\mathbf{Z}_i(h; \boldsymbol{\alpha}) - \mathbf{z}(h; \boldsymbol{\alpha})]^{\mathbf{j}} K_h(\mathbf{X}_i - \mathbf{x}; \hat{\boldsymbol{\alpha}}). \quad (\text{S.15})$$

The Taylor series of  $m(\mathbf{X}_i)$  at point  $\mathbf{x}$  with a mean-value form of remainder is

$$m(\mathbf{X}_i) = \sum_{0 \leq |\mathbf{k}| \leq 1} \frac{1}{\mathbf{k}!} (D^{\mathbf{k}}m)(\mathbf{x})(\mathbf{X}_i - \mathbf{x})^{\mathbf{k}} + \sum_{|\mathbf{k}|=2} \frac{1}{\mathbf{k}!} (D^{\mathbf{k}}m)(\tilde{\mathbf{x}}_i)(\mathbf{X}_i - \mathbf{x})^{\mathbf{k}}, \quad (\text{S.16})$$

where  $\tilde{\mathbf{x}}_i$  is a point between  $\mathbf{x}$  and  $\mathbf{X}_i$ . Substituting (S.16) and (S.12) to (S.15), we find

$$t_{\mathbf{j}}(\mathbf{x}) - t_{\mathbf{j}}^*(\mathbf{x}) = \sum_{0 \leq |\mathbf{k}| \leq 1} \frac{1}{\mathbf{k}!} h^{\mathbf{k} \cdot \boldsymbol{\alpha}} (D^{\mathbf{k}}m)(\mathbf{x}) s_{\mathbf{j}+\mathbf{k}}(\mathbf{x}) + e_{\mathbf{j}}(\mathbf{x}),$$

where

$$e_{\mathbf{j}}(\mathbf{x}) = \frac{1}{n} \sum_{|\mathbf{k}|=2} \frac{h^{\mathbf{k} \cdot \boldsymbol{\alpha}}}{\mathbf{k}!} \sum_{i=1}^n (D^{\mathbf{k}}m)(\tilde{\mathbf{x}}_i) [\mathbf{Z}_i(h; \boldsymbol{\alpha}) - \mathbf{z}(h; \boldsymbol{\alpha})]^{\mathbf{k}+\mathbf{j}} K_h(\mathbf{X}_i - \mathbf{x}; \hat{\boldsymbol{\alpha}}). \quad (\text{S.17})$$

By (S.11) and  $(D^{\mathbf{k}}m)(\mathbf{x}) = \mathbf{k}!b_{\mathbf{k}}(\mathbf{x})$ , we obtain

$$t_{\mathbf{j}}^*(\mathbf{x}) = \sum_{0 \leq |\mathbf{k}| \leq 1} h^{\mathbf{k} \cdot \boldsymbol{\alpha}} [\hat{b}_{\mathbf{k}}(\mathbf{x}) - b_{\mathbf{k}}(\mathbf{x})] s_{\mathbf{j}+\mathbf{k}}(\mathbf{x}) - e_{\mathbf{j}}(\mathbf{x}). \quad (\text{S.18})$$

For  $0 \leq |\mathbf{j}| \leq 1$ , using the same arrangement as for  $\tau(\mathbf{x})$ , we can define the  $(p+1)$  column vector  $\tau^*(\mathbf{x})$  and  $\mathbf{e}(\mathbf{x})$  as follows

$$\tau^*(\mathbf{x}) = \begin{bmatrix} t_{(0,\dots,0)}^*(\mathbf{x}) \\ t_{(1,\dots,0)}^*(\mathbf{x}) \\ \vdots \\ t_{(0,\dots,1)}^*(\mathbf{x}) \end{bmatrix}, \quad \mathbf{e}(\mathbf{x}) = \begin{bmatrix} e_{(0,\dots,0)}(\mathbf{x}) \\ e_{(1,\dots,0)}(\mathbf{x}) \\ \vdots \\ e_{(0,\dots,1)}(\mathbf{x}) \end{bmatrix}.$$

The vector form of (S.18) is

$$\tau^*(\mathbf{x}) = \mathbf{S}(\mathbf{x})(\hat{\theta}(\mathbf{x}) - \theta(\mathbf{x})) - \mathbf{e}(\mathbf{x}).$$

Thus,

$$\hat{\theta}(\mathbf{x}) - \theta(\mathbf{x}) = \mathbf{S}^{-1}(\mathbf{x})\tau^*(\mathbf{x}) + \mathbf{S}^{-1}(\mathbf{x})\mathbf{e}(\mathbf{x}). \quad (\text{S.19})$$

In the following proof, we use  $C$  to represent any positive constants that may be different from case to case.

**Lemma 2.** *Let  $D$  be any compact subset of  $\mathbb{R}^p$  and conditions (A1) and (A3) hold. Assume  $h = h_n \rightarrow 0$  and  $p_n \log(n)/(nh_n^{|\alpha|}) \rightarrow \infty$  as  $n \rightarrow \infty$ . Then, for each  $\mathbf{j}$  with  $0 \leq |\mathbf{j}| \leq 3$ ,*

$$\sup_{\mathbf{x} \in D} |s_{\mathbf{j}}(\mathbf{x}) - \mathbf{E}[s_{\mathbf{j}}(\mathbf{x})]| = O\left(\left(\frac{p_n \log(n)}{nh_n^{|\alpha|}}\right)^{1/2}\right) \quad a.s.$$

PROOF OF LEMMA 2. By the condition of random vector  $\mathbf{X}$  in (A1), we have  $f_{\mathbf{X}}(\mathbf{x}) < C_1$  on the support. By condition (A1), (A3) and equation (S.9),

$$\begin{aligned} |\mathbf{E}[s_{\mathbf{j}}(\mathbf{x})]| &= \int_{\mathbb{R}^p} \left(\frac{u^{[1]} - x^{[1]}}{h^{\alpha_1}}, \dots, \frac{u^{[p]} - x^{[p]}}{h^{\alpha_p}}\right)^{\mathbf{j}} K_h(\mathbf{u} - \mathbf{x}; \alpha) f_{\mathbf{X}}(\mathbf{u}) d\mathbf{u} + O\left(\frac{-\log(h)}{h\sqrt{n}}\right) \\ &\leq C_1 \int_{\mathbb{R}^p} \left(\frac{u^{[1]} - x^{[1]}}{h^{\alpha_1}}, \dots, \frac{u^{[p]} - x^{[p]}}{h^{\alpha_p}}\right)^{\mathbf{j}} K_h(\mathbf{u} - \mathbf{x}; \alpha) d\mathbf{u} + O\left(\frac{-\log(h)}{h\sqrt{n}}\right) \\ &= C_1 \int_{\mathbb{R}^p} \mathbf{t}^{\mathbf{j}} K(\mathbf{t}) d\mathbf{t} + O\left(\frac{-\log(h)}{h\sqrt{n}}\right) < \infty. \end{aligned} \quad (\text{S.20})$$

Thus, we have  $|\mathbf{E}[s_{\mathbf{j}}(\mathbf{x})]| = O(1)$ . Next, by (S.9), (S.20) and condition (A3)

$$\begin{aligned} nh_n^{|\alpha|} \text{Var}[s_{\mathbf{j}}(\mathbf{x})] &= h_n^{|\alpha|} \text{Var}\left(\left[\mathbf{Z}_1(h_n; \alpha) - \mathbf{z}(h_n; \alpha)\right]^{\mathbf{j}} K_{h_n}(\mathbf{X}_1 - \mathbf{x}; \alpha)\right) + o(h_n^{|\alpha|}) \\ &= h_n^{|\alpha|} \mathbf{E}\left(\left[\mathbf{Z}_1(h_n; \alpha) - \mathbf{z}(h_n; \alpha)\right]^{2\mathbf{j}} K_{h_n}^2(\mathbf{X}_1 - \mathbf{x}; \alpha)\right) - h_n^{|\alpha|} (\mathbf{E}[s_{\mathbf{j}}(\mathbf{x})])^2 + o(h_n^{|\alpha|}) \\ &= \int_{\mathbb{R}^p} \left(\frac{u^{[1]} - x^{[1]}}{h_n^{\alpha_1}}, \dots, \frac{u^{[p]} - x^{[p]}}{h_n^{\alpha_p}}\right)^{2\mathbf{j}} \left[\frac{1}{h_n^{|\alpha|}} K^2\left(\frac{u^{[1]} - x^{[1]}}{h_n^{\alpha_1}}, \dots, \frac{u^{[p]} - x^{[p]}}{h_n^{\alpha_p}}\right)\right] f_{\mathbf{X}}(\mathbf{u}) d\mathbf{u} + O(h_n^{|\alpha|}) \\ &= O(1) + O(h_n^{|\alpha|}) = O(1). \end{aligned} \quad (\text{S.21})$$

Let  $L = L(n) = \left\lceil \left(\frac{n}{h_n^{|\alpha|+2|\mathbf{j}|+2} \log(n)}\right)^{1/2} \right\rceil^p$ , where  $\lceil \cdot \rceil$  represents ceiling function. For computation simplicity, assume  $\left(\frac{n}{h_n^{|\alpha|+2|\mathbf{j}|+2} \log(n)}\right)^{1/2}$  is a positive integer, and  $L = L(n) = \left\lceil \frac{n}{h_n^{|\alpha|+2|\mathbf{j}|+2} \log(n)} \right\rceil^{p/2}$ . Since  $D$  is compact, it can be covered by  $L(n)$  cubes  $I_k = I_{n,k}$  centered at  $\mathbf{x}_k$  with side length  $\ell_n$  for  $k = 1, \dots, L(n)$ . Clearly,  $\ell_n \leq C_2/L^{1/p}(n)$  for some positive constant  $C_2$ . Then, we can write

$$\begin{aligned} \sup_{\mathbf{x} \in D} |s_{\mathbf{j}}(\mathbf{x}) - \mathbf{E}[s_{\mathbf{j}}(\mathbf{x})]| &= \max_{1 \leq k \leq L(n)} \sup_{\mathbf{x} \in D \cap I_k} |s_{\mathbf{j}}(\mathbf{x}) - \mathbf{E}[s_{\mathbf{j}}(\mathbf{x})]| \\ &\leq \max_{1 \leq k \leq L(n)} \sup_{\mathbf{x} \in D \cap I_k} |s_{\mathbf{j}}(\mathbf{x}) - s_{\mathbf{j}}(\mathbf{x}_k)| + \max_{1 \leq k \leq L(n)} |s_{\mathbf{j}}(\mathbf{x}_k) - \mathbf{E}[s_{\mathbf{j}}(\mathbf{x}_k)]| \\ &\quad + \max_{1 \leq k \leq L(n)} \sup_{\mathbf{x} \in D \cap I_k} |\mathbf{E}[s_{\mathbf{j}}(\mathbf{x}_k)] - \mathbf{E}[s_{\mathbf{j}}(\mathbf{x})]| \\ &= I + II + III. \end{aligned}$$

Since both  $\mathbf{X}$  and  $K(\cdot)$  have compact support in  $\mathbb{R}^p$ , by (S.12), (S.13), condition (A1) and (A3),

$$\begin{aligned}
& |s_{\mathbf{j}}(\mathbf{x}) - s_{\mathbf{j}}(\mathbf{x}_k)| \\
&= \frac{1}{nh_n^{|\alpha|}} \left| \sum_{i=1}^n [\mathbf{Z}_i(h; \alpha) - \mathbf{z}(h; \alpha)]^{\mathbf{j}} K_h(\mathbf{X}_i - \mathbf{x}; \hat{\alpha}) - [\mathbf{Z}_i(h; \alpha) - \mathbf{z}_k(h; \alpha)]^{\mathbf{j}} K_h(\mathbf{X}_i - \mathbf{x}_k; \hat{\alpha}) \right| \\
&\leq \frac{1}{nh_n^{|\alpha|}} \sum_{i=1}^n \left| [\mathbf{Z}_i(h; \alpha) - \mathbf{z}(h; \alpha)]^{\mathbf{j}} K_h(\mathbf{X}_i - \mathbf{x}; \hat{\alpha}) - [\mathbf{Z}_i(h; \alpha) - \mathbf{z}_k(h; \alpha)]^{\mathbf{j}} K_h(\mathbf{X}_i - \mathbf{x}; \hat{\alpha}) \right| \\
&\quad + \left| [\mathbf{Z}_i(h; \alpha) - \mathbf{z}_k(h; \alpha)]^{\mathbf{j}} K_h(\mathbf{X}_i - \mathbf{x}; \hat{\alpha}) - [\mathbf{Z}_i(h; \alpha) - \mathbf{z}_k(h; \alpha)]^{\mathbf{j}} K_h(\mathbf{X}_i - \mathbf{x}_k; \hat{\alpha}) \right| \\
&\leq \frac{1}{nh_n^{|\alpha|}} \sum_{i=1}^n K_h(\mathbf{X}_i - \mathbf{x}_k; \hat{\alpha}) \left| [\mathbf{Z}_i(h; \alpha) - \mathbf{z}(h; \alpha)]^{\mathbf{j}} - [\mathbf{Z}_i(h; \alpha) - \mathbf{z}_k(h; \alpha)]^{\mathbf{j}} \right| \\
&\quad + \left| [\mathbf{Z}_i(h; \alpha) - \mathbf{z}_k(h; \alpha)]^{\mathbf{j}} \right| \cdot C \left\| [\mathbf{Z}_i(h; \hat{\alpha}) - \mathbf{z}(h; \hat{\alpha})] - [\mathbf{Z}_i(h; \hat{\alpha}) - \mathbf{z}_k(h; \hat{\alpha})] \right\|
\end{aligned} \tag{S.22}$$

By the definition of  $I_k$ , we have

$$\sup_{\mathbf{x} \in D \cap I_k} \left| [\mathbf{Z}_i(h; \alpha) - \mathbf{z}(h; \alpha)]^{\mathbf{j}} - [\mathbf{Z}_i(h; \alpha) - \mathbf{z}_k(h; \alpha)]^{\mathbf{j}} \right| \leq h_n^{-|\mathbf{j}|} \ell_n,$$

and

$$\sup_{\mathbf{x} \in D \cap I_k} \left\| [\mathbf{Z}_i(h; \hat{\alpha}) - \mathbf{z}(h; \hat{\alpha})] - [\mathbf{Z}_i(h; \hat{\alpha}) - \mathbf{z}_k(h; \hat{\alpha})] \right\| \leq h_n^{-1} \sqrt{p_n} \ell_n.$$

Since kernel function  $K_h(\cdot)$  is bounded and  $\mathbf{X}$  has a compact support, we can substitute two previous inequalities to (S.22) to get

$$\begin{aligned}
I &\leq \frac{1}{nh_n^{|\alpha|}} \sum_{i=1}^n \{ C_3 h_n^{-|\mathbf{j}|} \ell_n + h_n^{-|\mathbf{j}|} C_4^{|\mathbf{j}|} \cdot C h_n^{-1} \sqrt{p_n} \ell_n \} \\
&= O\left( \frac{p_n^{1/2} \ell_n}{h_n^{|\alpha|+|\mathbf{j}|+1}} \right) = O\left( \left[ \frac{p_n \log(n)}{nh_n^{|\alpha|}} \right]^{1/2} \right) \quad a.s.
\end{aligned} \tag{S.23}$$

From (S.23) we can immediately get

$$III = O\left( \left[ \frac{p_n \log(n)}{nh_n^{|\alpha|}} \right]^{1/2} \right) \quad a.s. \tag{S.24}$$

The remaining task is to show  $II = O\left( \left[ \frac{p_n \log(n)}{nh_n^{|\alpha|}} \right]^{1/2} \right)$  almost surely. Write

$$s_{\mathbf{j}}(\mathbf{x}) - \mathbf{E}[s_{\mathbf{j}}(\mathbf{x})] := \sum_{i=1}^n V_{\mathbf{j},i}(\mathbf{x}),$$

where

$$V_{\mathbf{j},i}(\mathbf{x}) = \frac{1}{nh_n^{|\alpha|}} \{ [\mathbf{Z}_i(h; \alpha) - \mathbf{z}(h; \alpha)]^{\mathbf{j}} K_h(\mathbf{X}_i - \mathbf{x}; \hat{\alpha}) - \mathbf{E}[[\mathbf{Z}_i(h; \alpha) - \mathbf{z}(h; \alpha)]^{\mathbf{j}} K_h(\mathbf{X}_i - \mathbf{x}; \hat{\alpha})] \}. \tag{S.25}$$

Then for each  $\eta > 0$ ,

$$P(II > \eta) \leq L(n) \max_{1 \leq k \leq L(n)} P(|s_{\mathbf{j}}(\mathbf{x}_k) - \mathbf{E}[s_{\mathbf{j}}(\mathbf{x}_k)]| > \eta).$$

By assumption (A1) and (A3), let

$$[\mathbf{Z}_i(h; \boldsymbol{\alpha}) - \mathbf{z}(h; \boldsymbol{\alpha})]^{\mathbf{j}} K_h(\mathbf{X}_i - \mathbf{x}; \hat{\boldsymbol{\alpha}}) \leq A_1 \quad a.s.$$

for  $\mathbf{j}$  with  $0 \leq |\mathbf{j}| \leq 4$ . We have by (S.25),

$$|V_{\mathbf{j},i}(\mathbf{x})| \leq \frac{2A_1}{nh_n^{|\boldsymbol{\alpha}|}} \quad a.s. \quad i = 1, \dots, n.$$

Define

$$\lambda_n = \frac{1}{4A_1} [np_n h_n^{|\boldsymbol{\alpha}|} \log(n)]^{1/2},$$

then by the restriction of  $h_n$ , for large enough  $n$ ,

$$\lambda_n |V_{\mathbf{j},i}(\mathbf{x})| \leq \frac{1}{2}, \quad i = 1, \dots, n.$$

Thus,  $\exp\{\pm \lambda_n V_{\mathbf{j},i}(\mathbf{x})\} \leq 1 \pm \lambda_n V_{\mathbf{j},i}(\mathbf{x}) + \lambda_n^2 V_{\mathbf{j},i}^2(\mathbf{x})$  because  $e^t \leq 1 + t + t^2$  for  $|t| \leq 1/2$ . Based on this inequality, we have

$$\mathbf{E}\left[e^{\pm \lambda_n V_{\mathbf{j},i}(\mathbf{x})}\right] \leq 1 + \lambda_n^2 \mathbf{E}[V_{\mathbf{j},i}^2(\mathbf{x})] \leq e^{\lambda_n^2 \mathbf{E}[V_{\mathbf{j},i}^2(\mathbf{x})]}. \quad (\text{S.26})$$

By (S.26), Markov's inequality and the independence of  $\{V_{\mathbf{j},i}\}_{i=1}^n$ ,

$$\begin{aligned} P(|s_{\mathbf{j}}(\mathbf{x}_k) - \mathbf{E}[s_{\mathbf{j}}(\mathbf{x}_k)]| > \eta) &\leq \frac{\mathbf{E}[e^{\lambda_n \sum_{i=1}^n V_{\mathbf{j},i}(\mathbf{x}_k)}] + \mathbf{E}[e^{-\lambda_n \sum_{i=1}^n V_{\mathbf{j},i}(\mathbf{x}_k)}]}{e^{\lambda_n \eta}} \\ &\leq 2e^{-\lambda_n \eta} \left\{ e^{\lambda_n^2 \sum_{i=1}^n \mathbf{E}[V_{\mathbf{j},i}^2(\mathbf{x}_k)]} \right\} \\ &= 2e^{-\lambda_n \eta} \left\{ e^{\lambda_n^2 Var[s_{\mathbf{j}}(\mathbf{x}_k)]} \right\}. \end{aligned} \quad (\text{S.27})$$

Denote the upper bound on  $nh_n^{|\boldsymbol{\alpha}|} Var[s_{\mathbf{j}}(\mathbf{x})]$  by constant  $A_2$ , then by (S.21) and (S.27),

$$\max_{1 \leq k \leq L(n)} P(|s_{\mathbf{j}}(\mathbf{x}_k) - \mathbf{E}[s_{\mathbf{j}}(\mathbf{x}_k)]| > \eta) \leq 2 \exp \left\{ -\lambda_n \eta + \frac{\lambda_n^2 A_2}{nh_n^{|\boldsymbol{\alpha}|}} \right\}.$$

Let  $\eta = \eta_n = A_3 [p_n \log(n)/(nh_n^{|\boldsymbol{\alpha}|})]^{1/2}$ , we have

$$P(II > \eta_n) \leq L(n) \exp \left\{ \left( -\frac{A_3}{4A_1} + \frac{A_2}{16A_1^2} \right) p_n \log(n) \right\} = L(n) n^{-ap_n}, \quad (\text{S.28})$$

where  $a = \frac{A_3}{4A_1} - \frac{A_2}{16A_1^2}$ . By selecting a large enough  $A_3$ , we can ensure  $L(n)n^{-ap_n}$  is summable. Then, it follows by (S.28) and the Borel-Cantelli lemma that

$$II = O(\eta_n) = O\left(\left[p_n \frac{\log(n)}{nh_n^{|\alpha|}}\right]^{1/2}\right). \quad (\text{S.29})$$

Consequently, Lemma 2 follows from (S.23), (S.24) and (S.28).  $\square$

Then, the strong consistency of matrices  $\mathbf{S}$  can be obtained.

**Lemma 3.** *Under the same conditions as in Lemma 2, we have, uniformly in  $\mathbf{x} \in D$ ,*

$$\mathbf{S}(\mathbf{x}) \rightarrow \mathbf{E}(\mathbf{S}(\mathbf{x})), \quad a.s. \quad \text{as } n \rightarrow \infty.$$

We next consider the uniform strong consistency of the error term  $e_{\mathbf{j}}(\mathbf{x})$  given in (S.17).

**Lemma 4.** *Let  $D$  be any compact subset of  $\mathbb{R}^p$ . Let condition (A1) - (A4) hold, we have for each  $\mathbf{j}$  with  $0 \leq |\mathbf{j}| \leq 1$ ,*

$$\begin{aligned} \sup_{\mathbf{x} \in D} |e_{\mathbf{j}}(\mathbf{x}) - \mathbf{E}[e_{\mathbf{j}}(\mathbf{x})]| &= O\left(\omega_n^2 \left[\frac{p_n \log(n)}{nh_n^{|\alpha|}}\right]^{1/2}\right) \quad a.s. \\ \sup_{\mathbf{x} \in D} |e_{\mathbf{j}}(\mathbf{x})| &= O(\omega_n^2) \quad a.s. \end{aligned} \quad (\text{S.30})$$

PROOF OF LEMMA 4. For notation simplicity, we can write

$$e_{\mathbf{j}}(\mathbf{x}) = \sum_{|\mathbf{k}|=2} G_{n,\mathbf{k}+\mathbf{j}}(\mathbf{x}), \quad 0 \leq |\mathbf{j}| \leq 1,$$

where

$$G_{n,\mathbf{k}+\mathbf{j}}(\mathbf{x}) = \frac{1}{n} \sum_{i=1}^n \frac{h^{\mathbf{k} \cdot \alpha}}{\mathbf{k}!} (D^{\mathbf{k}}m)(\tilde{\mathbf{x}}_i) [\mathbf{Z}_i(h; \alpha) - \mathbf{z}(h; \alpha)]^{\mathbf{k}+\mathbf{j}} K_h(\mathbf{X}_i - \mathbf{x}; \hat{\alpha}).$$

For  $|\mathbf{k}| = 2$ , by the definition of  $(D^{\mathbf{k}}m)$ , there are  $j, k \in \{1, \dots, p\}$  such that

$$h_n^{\mathbf{k} \cdot \alpha} (D^{\mathbf{k}}m)(\mathbf{x}) = h_n^{\alpha_j + \alpha_k} \frac{\partial^2 m(\mathbf{x})}{\partial x^{[j]} \partial x^{[k]}}.$$

If  $\alpha_j = 0$  or  $\alpha_k = 0$ , then  $h_n^{\mathbf{k} \cdot \alpha} (D^{\mathbf{k}}m)(\mathbf{x}) = 0$ ; otherwise, by Lemma 1,

$$\sup_{\mathbf{x} \in \mathbb{R}^p} |h_n^{\mathbf{k} \cdot \alpha} (D^{\mathbf{k}}m)(\mathbf{x})| \leq C h_n^{\alpha_j + \alpha_k} \cdot \|\beta^{[j]}\| \cdot \|\beta^{[k]}\|,$$

for some constant  $C$  and specific pair  $(j, k) \in \{1, \dots, p\}^2$ . By (S.9), since  $\mathbf{k}! \geq 1$ ,

$$|\mathbf{E}[G_{n,\mathbf{k}+\mathbf{j}}(\mathbf{x})]| \leq C h_n^{\alpha_j + \alpha_k} \cdot \|\beta^{[j]}\| \cdot \|\beta^{[k]}\| \cdot |\mathbf{E}[s_{\mathbf{k}+\mathbf{j}}(\mathbf{x})]| = C h_n^{\alpha_j + \alpha_k} \cdot \|\beta^{[j]}\| \cdot \|\beta^{[k]}\|.$$

Thus,

$$\begin{aligned}
\sup_{\mathbf{x} \in \mathbb{R}^p} |\mathbf{E}[e_{\mathbf{j}}(\mathbf{x})]| &\leq \sup_{\mathbf{x} \in \mathbb{R}^p} \sum_{|\mathbf{k}|=2} |\mathbf{E}[G_{n,\mathbf{j}+\mathbf{k}}(\mathbf{x})]| \\
&\leq \sum_{\alpha_j \neq 0} \sum_{\alpha_k \neq 0} C h_n^{\alpha_j + \alpha_k} \cdot \|\beta^{[j]}\| \cdot \|\beta^{[k]}\| \\
&= C \cdot \left( \sum_{\alpha_j \neq 0} h_n^{\alpha_j} \|\beta^{[j]}\| \right)^2 = O(\omega_n^2).
\end{aligned} \tag{S.31}$$

Similarly,

$$\sup_{\mathbf{x} \in D} |G_{n,\mathbf{k}+\mathbf{j}}(\mathbf{x}) - \mathbf{E}[G_{n,\mathbf{k}+\mathbf{j}}(\mathbf{x})]| \leq C h_n^{\alpha_j + \alpha_k} \cdot \|\beta^{[j]}\| \cdot \|\beta^{[k]}\| \cdot \sup_{\mathbf{x} \in D} |s_{\mathbf{k}+\mathbf{j}}(\mathbf{x}) - \mathbf{E}[s_{\mathbf{k}+\mathbf{j}}(\mathbf{x})]|,$$

for some positive constant  $C$ . Then,

$$\begin{aligned}
\sup_{\mathbf{x} \in D} |e_{\mathbf{j}}(\mathbf{x}) - \mathbf{E}[e_{\mathbf{j}}(\mathbf{x})]| &\leq \sum_{|\mathbf{k}|=2} \sup_{\mathbf{x} \in D} |G_{n,\mathbf{k}+\mathbf{j}}(\mathbf{x}) - \mathbf{E}[G_{n,\mathbf{k}+\mathbf{j}}(\mathbf{x})]| \\
&\leq \sum_{\alpha_j \neq 0} \sum_{\alpha_k \neq 0} C h_n^{\alpha_j + \alpha_k} \cdot \|\beta^{[j]}\| \cdot \|\beta^{[k]}\| \cdot O\left(\left[\frac{p_n \log(n)}{n h_n^{|\alpha|}}\right]^{1/2}\right), \\
&= O\left(\omega_n^2 \left[\frac{p_n \log(n)}{n h_n^{|\alpha|}}\right]^{1/2}\right) \quad a.s.
\end{aligned} \tag{S.32}$$

Obviously, (S.30) directly follows by (S.31) and (S.32). Similar results for vector  $\mathbf{e}(\mathbf{x})$  can also be obtained.  $\square$

Using similar methods as in Lemma 2, we can get asymptotic result for  $t_{\mathbf{j}}^*(\mathbf{x})$ .

**Lemma 5.** *Let  $D$  be any compact subset of  $\mathbb{R}^d$  and conditions (A1) - (A4) hold. Let  $Y$  be bounded almost surely. For each  $\mathbf{j}$  with  $0 \leq |\mathbf{j}| \leq 1$ ,*

$$\sup_{\mathbf{x} \in D} |t_{\mathbf{j}}^*(\mathbf{x})| = O\left(\left[\frac{p_n \log(n)}{n h_n^{|\alpha|}}\right]^{1/2}\right) \quad a.s.$$

*Proof of Lemma 5.* Using the same definition of  $I_k$ 's, we have

$$\begin{aligned}
\sup_{\mathbf{x} \in D} |t_{\mathbf{j}}^*(\mathbf{x})| &= \max_{1 \leq k \leq L(n)} \sup_{\mathbf{x} \in D \cap I_k} |t_{\mathbf{j}}^*(\mathbf{x})| \\
&\leq \max_{1 \leq k \leq L(n)} \sup_{\mathbf{x} \in D \cap I_k} |t_{\mathbf{j}}^*(\mathbf{x}) - t_{\mathbf{j}}^*(\mathbf{x}_k)| + \max_{1 \leq k \leq L(n)} |t_{\mathbf{j}}^*(\mathbf{x}_k)| \\
&= I + II.
\end{aligned}$$

Now by equality (S.14), since  $Y$  is almost surely bounded and  $\mathbf{X}$  has a compact support, we have

almost surely

$$\begin{aligned}
& |t_j^*(\mathbf{x}) - t_j^*(\mathbf{x}_k)| \\
& \leq \frac{1}{n} \sum_{i=1}^n \left| [Y_i - m(\mathbf{X}_i)] \cdot \frac{1}{h_n^{|\boldsymbol{\alpha}|}} \right. \\
& \quad \left. \{ [\mathbf{Z}_i(h; \boldsymbol{\alpha}) - \mathbf{z}(h; \boldsymbol{\alpha})]^j K_h(\mathbf{X}_i - \mathbf{x}; \hat{\boldsymbol{\alpha}}) - [\mathbf{Z}_i(h; \boldsymbol{\alpha}) - \mathbf{z}_k(h; \boldsymbol{\alpha})]^j K_h(\mathbf{X}_i - \mathbf{x}_k; \hat{\boldsymbol{\alpha}}) \} \right| \\
& \leq \frac{C}{nh_n^\gamma} \sum_{i=1}^n \left| [\mathbf{Z}_i(h; \boldsymbol{\alpha}) - \mathbf{z}(h; \boldsymbol{\alpha})]^j K_h(\mathbf{X}_i - \mathbf{x}; \hat{\boldsymbol{\alpha}}) - [\mathbf{Z}_i(h; \boldsymbol{\alpha}) - \mathbf{z}_k(h; \boldsymbol{\alpha})]^j K_h(\mathbf{X}_i - \mathbf{x}_k; \hat{\boldsymbol{\alpha}}) \right|,
\end{aligned}$$

for some constant  $C > 0$ . Follow the same steps used in (S.22) and (S.23), we have

$$I \leq \frac{C}{h_n^{\gamma+1}} \cdot \frac{p_n^{1/2}}{L^{1/p}(n)} = O\left(\left[\frac{p_n \log(n)}{nh_n^{|\boldsymbol{\alpha}|}}\right]^{1/2}\right) \quad a.s.$$

For  $II$ , we can follow the same steps used for (S.29) in the proof of Lemma 2 to get

$$II = O\left(\left[\frac{p_n \log(n)}{nh_n^{|\boldsymbol{\alpha}|}}\right]^{1/2}\right) \quad a.s.$$

Thus, the statement follows.  $\square$

Then, we can prove Theorem 1 by combining the results of previous lemmas.

**PROOF OF THEOREM 1.** By condition (A5) and Lemma 3, suppose  $\lambda_{\min}(\mathbf{S}(\mathbf{x})) > c > 0$  for large enough  $n$ , where  $\lambda_{\min}$  represents the smallest eigenvalue. Thus,  $\lambda_{\max}(\mathbf{S}^{-1}(\mathbf{x})) < c^{-1} < \infty$ , where  $\lambda_{\max}$  is the largest eigenvalue. Then, we have by Lemma 5 that

$$\sup_{\mathbf{x} \in D} |\mathbf{S}^{-1}(\mathbf{x}) \tau^*(\mathbf{x})|_{\max} \leq \sup_{\mathbf{x} \in D} c^{-1} |\tau^*(\mathbf{x})|_{\max} = O\left(\left[\frac{p_n \log(n)}{nh_n^{|\boldsymbol{\alpha}|}}\right]^{1/2}\right) \quad a.s.$$

Here,  $|\mathbf{u}|_{\max}$  denote the largest absolute element in a vector  $\mathbf{u}$ . Similarly, by Lemma 4 and condition (A5),

$$\sup_{\mathbf{x} \in D} |\mathbf{S}^{-1}(\mathbf{x}) \mathbf{e}(\mathbf{x})| = O(\omega_n^2) \quad a.s.$$

Therefore, the result follows after dividing both sides by  $h_n^{\alpha_j}$ .  $\square$

Before the proof of Theorem 2, we propose the following lemma firstly.

**Lemma 6.** *Let  $M$  and  $N$  be two symmetric  $p \times p$  matrices with eigen-decomposition*

$$M = \sum_{i=1}^p \lambda_i \mathbf{v}_i \mathbf{v}_i^\top, \quad \lambda_1 \geq \lambda_2 \geq \dots \geq \lambda_p,$$

and

$$N = \sum_{i=1}^p \delta_i \mathbf{u}_i \mathbf{u}_i^\top, \quad \delta_1 \geq \delta_2 \geq \dots \geq \delta_p,$$

where  $\lambda$ 's and  $\delta$ 's are eigenvalues of  $M$  and  $N$ ,  $\mathbf{v}$ 's and  $\mathbf{u}$ 's are orthogonal unit eigenvectors correspondingly. Furthermore, let

$$\lambda_{n_{j-1}+1} = \dots = \lambda_{n_j} = \tilde{\lambda}_j, \quad n_0 = 0 < n_1 < \dots < n_s = p, \quad j = 1, \dots, s,$$

such that

$$\tilde{\lambda}_1 > \tilde{\lambda}_2 > \dots > \tilde{\lambda}_s \geq 0.$$

Suppose  $\tilde{\lambda}_{s-1} - \tilde{\lambda}_s > c > 0$  and  $M - N = \mathbf{O}(\alpha)$ , where  $\mathbf{O}(\alpha)$  represents any matrix that each entry is of order  $O(\alpha)$  for simplicity. Then,

- (i)  $|\lambda_i - \delta_i| = O(p\alpha)$ , for  $i = 1, \dots, p$ ;
- (ii)  $|\sum_{i=n_{j-1}+1}^{n_j} \mathbf{u}_i \mathbf{u}_i^\top - \sum_{i=n_{j-1}+1}^{n_j} \mathbf{v}_i \mathbf{v}_i^\top| = O(p\alpha)$  for  $j = 1, \dots, s$ .

*Proof of Lemma 6.* By von Neumann's inequality and the property of trace, we have

$$|\lambda_i - \delta_i| = \sqrt{(\lambda_i - \delta_i)^2} \leq \sqrt{\sum_{i=1}^p (\lambda_i - \delta_i)^2} \leq \sqrt{\text{tr}[(M - N)^2]} = O(p\alpha),$$

which shows (i).

Let  $\mathbf{U} = (\mathbf{u}_1, \dots, \mathbf{u}_p)$  and  $\mathbf{V} = (\mathbf{v}_1, \dots, \mathbf{v}_p)$ . By the definitions of  $u_i$ 's and  $v_i$ 's, the eigenvalues of  $\mathbf{U}$  and  $\mathbf{V}$  are either 1 or -1. Therefore,

$$\begin{aligned} N &= \sum_{i=1}^p \lambda_i \mathbf{u}_i \mathbf{u}_i^\top + \sum_{i=1}^p (\delta_i - \lambda_i) \mathbf{u}_i \mathbf{u}_i^\top \\ &= \sum_{j=1}^s \tilde{\lambda}_j \sum_{i \in L_j} \mathbf{u}_i \mathbf{u}_i^\top + \mathbf{U} \text{diag}(\delta_1 - \lambda_1, \delta_2 - \lambda_2, \dots, \delta_p - \lambda_p) \mathbf{U}^\top \\ &= N' + \mathbf{O}(p\alpha), \end{aligned}$$

where  $L_j = (n_{j-1} + 1, \dots, n_j)$ . Then, it is obvious that  $M - N' = \mathbf{O}(p\alpha)$ .

When  $s = 1$ , (ii) is trivial. Assume (ii) is true for  $s = t$ , when  $s = t + 1$ ,

$$\sum_{j=1}^t (\tilde{\lambda}_j - \tilde{\lambda}_{t+1}) \sum_{i \in L_j} \mathbf{u}_i \mathbf{u}_i^\top = \sum_{j=1}^t (\tilde{\lambda}_j - \tilde{\lambda}_{t+1}) \sum_{i \in L_j} \mathbf{v}_i \mathbf{v}_i^\top + \mathbf{O}(p\alpha), \quad (\text{S.33})$$

where the LHS equals to  $[N' - \mathbf{I}_p]$  and the RHS is  $[M - \mathbf{I}_p + \mathbf{O}(p\alpha)]$ . Multiply from right by  $\mathbf{v}_k, k \in L_{t+1}$  on both sides of (S.33), we have

$$\sum_{j=1}^t (\tilde{\lambda}_j - \tilde{\lambda}_{t+1}) \sum_{i \in L_j} \mathbf{u}_i (\mathbf{u}_i^\top \mathbf{v}_k) = \mathbf{O}(p\alpha),$$

which implies that  $\mathbf{u}_i^\top \mathbf{v}_k = O(p\alpha)$  for  $1 \leq i \leq n_t$  and  $k \in L_{t+1}$ . Thus, we have

$$\mathbf{U}_1^\top \mathbf{V}_2 = \mathbf{O}(p\alpha), \quad \mathbf{V}_1^\top \mathbf{U}_2 = \mathbf{O}(p\alpha), \quad (\text{S.34})$$

where

$$\mathbf{U}_1 = (\mathbf{u}_1, \dots, \mathbf{u}_{n_t}), \mathbf{U}_2 = (\mathbf{u}_{n_t+1}, \dots, \mathbf{u}_{n_{t+1}}), \mathbf{V}_1 = (\mathbf{v}_1, \dots, \mathbf{v}_{n_t}), \mathbf{V}_2 = (\mathbf{v}_{n_t+1}, \dots, \mathbf{v}_{n_{t+1}}).$$

By the property of singular value, the largest singular value of  $\mathbf{V}_1, \mathbf{V}_2$  and  $\mathbf{U}_1, \mathbf{U}_2$  are not larger than 1. By (S.34) and note that  $n_{t+1} = p$ ,

$$\mathbf{V}_2^\top \mathbf{U}_2 \mathbf{U}_2^\top \mathbf{V}_2 = \mathbf{V}_2^\top (\mathbf{I}_p - \mathbf{U}_1 \mathbf{U}_1^\top) \mathbf{V}_2 = \mathbf{V}_2^\top \mathbf{V}_2 + \mathbf{O}(p\alpha) = \mathbf{I}_{p-n_t} + \mathbf{O}(p\alpha). \quad (\text{S.35})$$

Let  $\mathbf{U}_2 = \mathbf{V}_1 \mathbf{G}_1 + \mathbf{V}_2 \mathbf{G}_2$ , where  $\mathbf{G}_1 : n_t \times (p - n_t)$  and  $\mathbf{G}_2 : (p - n_t) \times (p - n_t)$ . By (S.33) and (S.34),

$$\mathbf{U}_2 = \mathbf{V}_2 \mathbf{G}_2 + \mathbf{V}_1 (\mathbf{G}_1 + \mathbf{V}_1^\top \mathbf{V}_2 \mathbf{G}_2) = \mathbf{V}_2 \mathbf{G}_2 + \mathbf{V}_1 (\mathbf{V}_1^\top \mathbf{U}_2) = \mathbf{V}_2 \mathbf{G}_2 + \mathbf{O}(p\alpha). \quad (\text{S.36})$$

Then, by (S.35) and (S.36)

$$\mathbf{G}_2 \mathbf{G}_2^\top = \mathbf{V}_2^\top \mathbf{V}_2 \mathbf{G}_2 \mathbf{G}_2^\top \mathbf{V}_2^\top \mathbf{V}_2^\top = \mathbf{V}_2^\top \mathbf{U}_2 \mathbf{U}_2^\top \mathbf{V}_2^\top + \mathbf{O}(p\alpha) = \mathbf{I}_{p-n_t} + \mathbf{O}(p\alpha). \quad (\text{S.37})$$

From (S.36) and (S.37), it follows that

$$\sum_{j \in L_{t+1}} \mathbf{u}_j \mathbf{u}_j^\top = \mathbf{U}_2 \mathbf{U}_2^\top = \mathbf{V}_2 \mathbf{V}_2^\top + \mathbf{O}(n_t \alpha) = \sum_{j \in L_{t+1}} \mathbf{v}_j \mathbf{v}_j^\top + \mathbf{O}(p\alpha), \quad (\text{S.38})$$

and that

$$\sum_{j=1}^{t-1} \tilde{\lambda}_j \sum_{i \in L_j} \mathbf{u}_i \mathbf{u}_i^\top + \tilde{\lambda}_t \sum_{i \in L_t \cup L_{t+1}} \mathbf{u}_i \mathbf{u}_i^\top = \sum_{j=1}^{t-1} \tilde{\lambda}_j \sum_{i \in L_j} \mathbf{v}_i \mathbf{v}_i^\top + \tilde{\lambda}_t \sum_{i \in L_t \cup L_{t+1}} \mathbf{v}_i \mathbf{v}_i^\top + \mathbf{O}(p\alpha).$$

By induction,

$$\sum_{i \in L_j} \mathbf{u}_i \mathbf{u}_i^\top = \sum_{i \in L_j} \mathbf{v}_i \mathbf{v}_i^\top + \mathbf{O}(p\alpha), \quad j = 1, \dots, t-1, \quad (\text{S.39})$$

and

$$\sum_{i \in L_t \cup L_{t+1}} \mathbf{u}_i \mathbf{u}_i^\top = \sum_{i \in L_t \cup L_{t+1}} \mathbf{v}_i \mathbf{v}_i^\top + \mathbf{O}(p\alpha). \quad (\text{S.40})$$

Therefore, (ii) is true for  $s = t + 1$  by (S.38) - (S.40).  $\square$

PROOF OF THEOREM 2. By condition (A1), we can denote the support of  $\mathbf{X}$  by  $D$ , which is a compact set in  $\mathbb{R}^p$ . Then, for every  $\mathbf{x} \in D$ ,

$$\hat{\mathbf{b}}(\mathbf{x}) \stackrel{a.s.}{=} \mathbf{b}(\mathbf{x}) + \Delta \mathbf{b}_n(\mathbf{x}) = B_0 \nabla g(B_0^\top \mathbf{x}) + \Delta \mathbf{b}_n(\mathbf{x}), \quad (\text{S.41})$$

where  $\Delta \mathbf{b}_n(\mathbf{x}) = (\mathbf{b}_n^{[1]}(\mathbf{x}), \dots, \mathbf{b}_n^{[p]}(\mathbf{x}))^\top$  is a  $p$ -dimensional vector. By high-dimensional linear regression, it is easy to know that  $\mathbf{b}_n^{[j]}(\mathbf{x}) = O_p(\sqrt{p_n/n})$  when  $\alpha_j = 0$ . Otherwise, by Theorem 1, we have  $\mathbf{b}_n^{[j]}(\mathbf{x}) = O(c_n^{[j]})$  almost surely with  $c_n^{[j]} = (\frac{p_n \log(n)}{n h_n^{|\alpha|+2\alpha_j}})^{1/2} + \omega_n^2/h_n^{\alpha_j}$ . Since  $\sqrt{p_n/n} = o(c_n^{[j]})$  for all  $j$ 's, it is obvious that  $\mathbf{b}_n^{[j]}(\mathbf{x}) = O_p(c_n^{[j]})$ .

Let  $(B_0, \tilde{B}_0)$  be a  $p \times p$  orthogonal matrix, we can write

$$\hat{\mathbf{b}}_j := (B_0, \tilde{B}_0) \begin{pmatrix} \nabla g(B_0^\top \mathbf{X}_j) + B_0^\top \Delta \mathbf{b}_n(\mathbf{X}_j) \\ \tilde{B}_0^\top \Delta \mathbf{b}_n(\mathbf{X}_j) \end{pmatrix},$$

and

$$\hat{\Sigma} := \frac{1}{n} \sum_{j=1}^n \hat{\mathbf{b}}_j \hat{\mathbf{b}}_j^\top = (B_0, \tilde{B}_0) G_n(p_n, h_n) (B_0, \tilde{B}_0)^\top. \quad (\text{S.42})$$

In the previous equality,  $G_n(p_n, h_n)$  is a  $p \times p$  matrix defined as

$$\begin{aligned} G(p_n, h_n) &:= \frac{1}{n} \sum_{j=1}^n \begin{pmatrix} \nabla g(B_0^\top \mathbf{X}_j) + B_0^\top \Delta \mathbf{b}_n(\mathbf{X}_j) \\ \tilde{B}_0^\top \Delta \mathbf{b}_n(\mathbf{X}_j) \end{pmatrix} \begin{pmatrix} \nabla g(B_0^\top \mathbf{X}_j) + B_0^\top \Delta \mathbf{b}_n(\mathbf{X}_j) \\ \tilde{B}_0^\top \Delta \mathbf{b}_n(\mathbf{X}_j) \end{pmatrix}^\top \\ &= \begin{pmatrix} \Lambda_n^{(1)} & \Lambda_n^{(2)} \\ \Lambda_n^{(3)} & \Lambda_n^{(4)} \end{pmatrix} \end{aligned}$$

where

$$\begin{aligned} \Lambda_n^{(1)} &= \frac{1}{n} \sum_{j=1}^n \{ \nabla g(B_0^\top \mathbf{X}_j) \nabla^\top g(B_0^\top \mathbf{X}_j) \\ &\quad + 2B_0^\top \Delta \mathbf{b}_n(\mathbf{X}_j) \nabla^\top g(B_0^\top \mathbf{X}_j) + B_0^\top \Delta \mathbf{b}_n(\mathbf{X}_j) [\Delta \mathbf{b}_n(\mathbf{X}_j)]^\top B_0 \} \\ \Lambda_n^{(3)} &= (\Lambda_n^{(2)})^\top = \frac{1}{n} \sum_{j=1}^n \tilde{B}_0^\top \Delta \mathbf{b}_n(\mathbf{X}_j) \nabla^\top g(B_0^\top \mathbf{X}_j) \\ \Lambda_n^{(4)} &= \frac{1}{n} \sum_{j=1}^n \tilde{B}_0^\top \Delta \mathbf{b}_n(\mathbf{X}_j) [\Delta \mathbf{b}_n(\mathbf{X}_j)]^\top \tilde{B}_0. \end{aligned}$$

By condition (A6),  $\nabla g(B_0^\top \mathbf{x})$  is bounded for all possible  $\mathbf{x}$ . For a  $p$ -dimensional unit vector  $\beta$ ,

$$\beta^\top \Delta \mathbf{b}_n(\mathbf{x}) \leq \|\beta\| \cdot \|\Delta \mathbf{b}_n(\mathbf{x})\| \leq \left[ \sum_{\alpha_j \neq 0} (c_n^{[j]})^2 + \sum_{\alpha_j = 0} p_n/n \right]^{1/2} := \sigma_n \quad \text{in probability.}$$

Therefore,

$$B_0^\top \Delta \mathbf{b}_n(\mathbf{x}) \nabla^\top g(B_0^\top \mathbf{x}) = \mathcal{E}(\sigma_n),$$

where  $\mathcal{E}(\sigma_n)$  represents matrix that each entry is of order  $O_p(\sigma_n)$ . And similarly,

$$B_0^\top \Delta \mathbf{b}_n(\mathbf{X}_j) [\Delta \mathbf{b}_n(\mathbf{X}_j)]^\top B_0 = \mathcal{E}(\sigma_n^2).$$

By the central limit theorem, one is easy to derive that

$$\frac{1}{n} \sum_{j=1}^n \nabla g(B_0^\top \mathbf{X}_j) \nabla^\top g(B_0^\top \mathbf{X}_j) = \int_{\mathbb{R}^p} \nabla g(B_0^\top \mathbf{x}) \nabla^\top g(B_0^\top \mathbf{x}) f_{\mathbf{X}}(\mathbf{x}) d\mathbf{x} + \mathcal{E}(1/\sqrt{n}).$$

Consequently, we have

$$\Lambda_n^{(1)} = \int_{\mathbb{R}^p} \nabla g(B_0^\top \mathbf{x}) \nabla^\top g(B_0^\top \mathbf{x}) f_{\mathbf{X}}(\mathbf{x}) d\mathbf{x} + \mathcal{E}(\sigma_n) := \Lambda_\infty^{(1)} + \mathcal{E}(\sigma_n + 1/\sqrt{n}).$$

By (i) of Lemma 6, it can be known that the eigenvalues of  $\Lambda_n^{(1)}$  is asymptotically converge to the eigenvalues of  $\Lambda_\infty^{(1)}$  in probability with order  $O(d \cdot (\sigma_n + 1/\sqrt{n}))$ .

Next,

$$\Lambda_n^{(4)} = \tilde{B}_0^\top \int_{\mathbb{R}^p} \Delta \mathbf{b}(\mathbf{x}) \Delta \mathbf{b}^\top(\mathbf{x}) f_{\mathbf{X}}(\mathbf{x}) d\mathbf{x} \tilde{B}_0 + \mathcal{E}(\sqrt{1/n}) := \Lambda_\infty^{(4)} + \mathcal{E}(\sqrt{1/n}).$$

Since the eigenvalue of  $\Delta \mathbf{b}(\mathbf{x}) \Delta \mathbf{b}^\top(\mathbf{x})$  is either 0 or  $\|\Delta \mathbf{b}(\mathbf{x})\|^2 = O_p(\sigma_n^2)$ , the eigenvalues of matrix  $\Lambda_\infty^{(4)}$  have order  $O(\sigma_n^2)$ . By (i) of Lemma 6 again, the eigenvalues of matrix  $\Lambda_\infty^{(4)}$  have order  $O(\sigma_n^2 + (p-d)/\sqrt{n})$ .

Let  $\lambda_1 \geq \dots \geq \lambda_p$  be the eigenvalues of  $\hat{\Sigma}$  and  $\hat{\beta}_1, \dots, \hat{\beta}_p$  be their corresponding unit orthogonal eigenvectors. By the Eigenvalue Interlacing Theorem and property of  $p_n, d_n$  and  $h_n$  in the assumptions, we have  $\min\{\lambda_1, \dots, \lambda_d\} > c > 0$  and  $\max\{\lambda_{d+1}, \dots, \lambda_p\} = O(\sigma_n^2 + (p-d)/\sqrt{n}) = o(1)$ . Therefore, the “top- $d$ ” eigenvalues can be distinguish from others asymptotically.

Similar to  $\Lambda_n^{(1)}$ , it can be shown that  $\Lambda_n^{(2)} = (\Lambda_n^{(3)})^\top = \mathcal{E}(\sigma_n + 1/\sqrt{n})$ . It is noteworthy to mention that, by the definition of  $(B_0, \tilde{B}_0)$ , the norm of each column or row vector has order 1. Then, by (S.42), we have in probability

$$\hat{\Sigma} = B_0 \Lambda_n^{(1)} B_0^\top + \mathcal{E}(\sigma_n + 1/\sqrt{n}).$$

Let  $\hat{B} = (\hat{\beta}_1, \dots, \hat{\beta}_d)$ , using (ii) of Lemma 6, we can get

$$\hat{B} \hat{B}^\top - B_0^\top B_0^\top = \mathcal{E}(d_n p_n \sigma_n + d_n p_n / \sqrt{n}) \quad \text{in probability.} \quad (\text{S.43})$$

Therefore, by assumption (A7),

$$|\hat{B} \hat{B}^\top - B_0^\top B_0^\top| \xrightarrow{P} 0 \quad \text{as } n \rightarrow \infty.$$

This completes the proof.  $\square$

**Remark 2.** Note that we allow  $d = d_n \rightarrow \infty$  providing that (S.43) converges. Considering the requirement on  $d = d_n$  given in Remark 1, the estimator of CMS is also consistent when  $d_n = o(\log(n))$ .

### S.3. Proofs of Theorem 3 and Theorem 4

We start with the following Lemma.

**Lemma 7.** Suppose conditions in Theorem 3 hold, we have

$$CV(d, k) = \zeta_0(d) + \left\{ \zeta_1(d)k^{-1} + \zeta_2(d)(k/n)^{\frac{4}{d}} \right\} \{1 + o_p(1)\},$$

where  $\zeta_0(d) = \mathbf{E}|Y - \mathbf{1}(p_d(\mathbf{U}) > 1/2)|$ .  $\zeta_1(d)$  and  $\zeta_2(d)$  are two non-negative values given in Appendix.

For the constants in the lemma, let

$$a(\mathbf{u}) = \frac{\sum_{s=1}^d c_{s,d} \{p_d^{(s)}(\mathbf{u})f_d^{(s)}(\mathbf{u}) + (1/2)p_d^{(ss)}(\mathbf{u})f_d(\mathbf{u})\}}{a_d^{1+2/d} f_d(\mathbf{u})^{1+2/d}},$$

where  $c_{s,d} = \int_{v: \|v\| \leq 1} v_s^2 dv$  with  $v_s$  being the  $s$ -th element of vector  $v$ . Then,

$$\begin{aligned} \zeta_1(d) &= \int_{\Omega} \frac{f_d(\mathbf{u}_0)}{4\|\dot{p}_d(\mathbf{u}_0)\|} dVol^{d-1}(\mathbf{u}_0) \quad \text{and} \\ \zeta_2(d) &= \int_{\Omega} \frac{f_d(\mathbf{u}_0)}{\|\dot{p}_d(\mathbf{u}_0)\|} a(\mathbf{u}_0)^2 dVol^{d-1}(\mathbf{u}_0), \end{aligned}$$

where  $Vol^{d-1}$  denotes the natural  $(d-1)$ -dimensional volume where  $\Omega$  inherits as a subset of  $\mathbb{R}^d$ . It is obvious that  $\zeta_1 > 0$  and  $\zeta_2 \geq 0$ , while the equality holds if and only if  $a(\mathbf{u}) = 0$  for all  $u \in \Omega$ .

PROOF OF LEMMA 7. For notation simplicity, let  $\mathcal{T}_n = \{(\mathbf{U}_i, Y_i), i = 1, \dots, n\} = \mathcal{S}_n^{PD}$ , where  $\mathbf{U}_i = (PD)^\top \mathbf{X}_i$ . Since  $Y \in \{0, 1\}$ , it is easy to obtain that

$$\begin{aligned} CV(d, k) &= \frac{1}{n} \sum_{i=1}^n |Y_i - \mathbf{1}(\hat{p}_{d, \setminus i}(\mathbf{U}_i) > \frac{1}{2})| \\ &= \frac{1}{n} \sum_{i=1}^n \left\{ |Y_i - \mathbf{1}(\hat{p}_{d, \setminus i}(\mathbf{U}_i) > \frac{1}{2})| - |Y_i - \mathbf{1}(p_d(\mathbf{U}_i) > \frac{1}{2})| \right\} + \frac{1}{n} \sum_{i=1}^n |Y_i - \mathbf{1}(p_d(\mathbf{U}_i) > \frac{1}{2})| \end{aligned}$$

where  $\hat{p}_{d, \setminus i}(\mathbf{U}_i)$  is the kNN estimation of  $\mathbf{P}(Y_i = 1 | \mathbf{U}_i)$  based on delete-one-observation  $\mathcal{T}_n \setminus (\mathbf{U}_i, Y_i)$ .

Let  $\mathcal{R}_{d, n-1}^{kNN} = \mathbf{E}|Y_i - \mathbf{1}(\hat{p}_{d, \setminus i}(\mathbf{U}_i) > \frac{1}{2})|$ , where the expectation is computed with respect to  $(\mathbf{U}_i, Y_i)_{i=1}^n$ . We will first show that

$$\frac{1}{n} \sum_i \left\{ |Y_i - \mathbf{1}(\hat{p}_{d, \setminus i}(\mathbf{U}_i) > \frac{1}{2})| - |Y_i - \mathbf{1}(p_d(\mathbf{U}_i) > \frac{1}{2})| \right\} = \mathcal{R}_{d, n-1}^{kNN} - \zeta_0(d) + o_p(k^{-1} + (k/n)^{\frac{4}{d}}). \quad (\text{S.44})$$

For notation simplicity, denote  $|Y_i - \mathbf{1}(\hat{p}_{d,\setminus i}(\mathbf{U}_i) > \frac{1}{2})|$  and  $|Y_i - \mathbf{1}(p_d(\mathbf{U}_i) > \frac{1}{2})|$  by  $\hat{\xi}_i(d)$  and  $\xi_i(d)$  respectively. Thus, we can compute the expectation

$$\mathbf{E}\left[\frac{1}{n}\sum_{i=1}^n\{\hat{\xi}_i(d) - \xi_i(d)\}\right] = \mathcal{R}_{d,n-1}^{kNN} - \zeta_0(d),$$

and the variance

$$\begin{aligned} \mathbf{Var}\left[\frac{1}{n}\sum_{i=1}^n\{\hat{\xi}_i(d) - \xi_i(d)\}\right] &= n^{-2}\mathbf{E}\left[\sum_{i=1}^n\{\hat{\xi}_i(d) - \xi_i(d)\}\right]^2 - \left(\mathbf{E}\left[\frac{1}{n}\sum_{i=1}^n\{\hat{\xi}_i(d) - \xi_i(d)\}\right]\right)^2 \\ &= n^{-2}\mathbf{E}\left[\sum_{i=1}^n\sum_{j=1}^n\{\hat{\xi}_i(d) - \xi_i(d)\}\{\hat{\xi}_j(d) - \xi_j(d)\}\right] - [\mathcal{R}_{d,n-1}^{kNN} - \zeta_0(d)]^2. \end{aligned}$$

Consider the first term on the RHS, since  $(\mathbf{U}_i, Y_i)_{i=1}^n$  are independent and identically distributed,

$$\begin{aligned} n^{-2}\mathbf{E}\left[\sum_{i=1}^n\sum_{j=1}^n\{\hat{\xi}_i(d) - \xi_i(d)\}\{\hat{\xi}_j(d) - \xi_j(d)\}\right] &= \mathbf{E}\left[\{\hat{\xi}_i(d) - \xi_i(d)\}\{\hat{\xi}_j(d) - \xi_j(d)\}\right] \\ &= \mathbf{E}\left[\{\hat{\xi}_i(d) - \xi_i(d)\}\{\hat{\xi}_j(d) - \xi_j(d)\} \cdot \mathbf{1}\{\|\mathbf{U}_i - \mathbf{U}_j\| > r(\mathbf{U}_i, k) + r(\mathbf{U}_j, k)\}\right] \\ &\quad + \mathbf{E}\left[\{\hat{\xi}_i(d) - \xi_i(d)\}\{\hat{\xi}_j(d) - \xi_j(d)\} \cdot \mathbf{1}\{\|\mathbf{U}_i - \mathbf{U}_j\| \leq r(\mathbf{U}_i, k) + r(\mathbf{U}_j, k)\}\right] \\ &= I + II, \end{aligned} \tag{S.45}$$

where  $r(u, k) := \|\mathbf{U}_{(k)} - u\|$  is the distance between  $u$  and its  $k$ -th nearest neighbor.

When the distance  $\|\mathbf{U}_i - \mathbf{U}_j\| > r(\mathbf{U}_i, k) + r(\mathbf{U}_j, k)$ ,  $\hat{p}_{d,\setminus i}(\mathbf{U}_i)$  and  $\hat{p}_{d,\setminus j}(\mathbf{U}_j)$  are independent, since there is no  $\mathbf{U}_t$  such that both  $\|\mathbf{U}_t - \mathbf{U}_i\| \leq r(\mathbf{U}_i, k)$  and  $\|\mathbf{U}_t - \mathbf{U}_j\| \leq r(\mathbf{U}_j, k)$  are satisfied. Thus,  $\{\hat{\xi}_i(d) - \xi_i(d)\}$  and  $\{\hat{\xi}_j(d) - \xi_j(d)\}$  are independent under this condition. Then,

$$I \leq \mathbf{E}\{\hat{\xi}_i(d) - \xi_i(d)\}\mathbf{E}\{\hat{\xi}_j(d) - \xi_j(d)\} = [\mathcal{R}_{d,n-1}^{kNN} - \zeta_0(d)]^2. \tag{S.46}$$

For term II, we can assume  $r(\mathbf{U}_i, k) \geq r(\mathbf{U}_j, k)$  without loss of generality. Since  $\hat{\xi}_i(d)$  and  $\xi_i(d)$  can only be 0 or 1,  $\{\hat{\xi}_i(d) - \xi_i(d)\}\{\hat{\xi}_j(d) - \xi_j(d)\} \leq |\hat{\xi}_i(d) - \xi_i(d)|$ . Then,

$$\begin{aligned} II &\leq \mathbf{E}\left[|\hat{\xi}_i(d) - \xi_i(d)| \cdot \mathbf{1}\{\|\mathbf{U}_i - \mathbf{U}_j\| \leq r(\mathbf{U}_i, k) + r(\mathbf{U}_j, k)\}\right] \\ &\leq \mathbf{E}\left[\left||Y_i - \mathbf{1}(\hat{p}_{d,\setminus i}(\mathbf{U}_i) > \frac{1}{2})| - |Y_i - \mathbf{1}(p_d(\mathbf{U}_i) > \frac{1}{2})|\right| \cdot \mathbf{1}\{\|\mathbf{U}_i - \mathbf{U}_j\| \leq 2r(\mathbf{U}_i, k)\}\right] \\ &= \mathbf{E}\left[\left|\mathbf{1}(\hat{p}_{d,\setminus i}(\mathbf{U}_i) > \frac{1}{2}) - \mathbf{1}(p_d(\mathbf{U}_i) > \frac{1}{2})\right| \cdot \mathbf{1}\{\|\mathbf{U}_i - \mathbf{U}_j\| \leq 2r(\mathbf{U}_i, k)\}\right]. \end{aligned}$$

By the boundedness of  $\dot{p}_d(\mathbf{u})$  in (B2) and the boundedness of  $d$ ,  $p_d(\mathbf{u})$  has Lipschitz continuity condition. By (B3) one can prove that  $f(x) \geq f_{min} > 0$  for some constant  $f_{min}$ . According

to the proofs in [Chaudhuri and Dasgupta \(2014\)](#) (Lemma 2, Theorem 3 and Theorem 5), let  $\partial_\Delta = \{\mathbf{u} \in W \mid |p_d(\mathbf{u}) - \frac{1}{2}| \leq \Delta\}$ , where  $\Delta = \sqrt{\frac{1}{k} \log \frac{2}{\delta}} + A_1 \left(\frac{k}{2n}\right)^{1/d}$  for any  $\delta > 0$ . Then

$$|\mathbf{1}(\hat{p}_{d,\setminus i}(\mathbf{U}_i) > \frac{1}{2}) - \mathbf{1}(p_d(\mathbf{U}_i) > \frac{1}{2})| \leq \mathbf{1}(\mathbf{U}_i \in \partial_\Delta) + \mathbf{1}((\mathbf{U}_1, \dots, \mathbf{U}_n) \in \Phi_1) + \mathbf{1}((\mathbf{U}_1, \dots, \mathbf{U}_n) \in \Phi_2),$$

where  $\Phi_1$  and  $\Phi_2$  are small sets such that  $\mathbf{E}[\mathbf{1}((\mathbf{U}_1, \dots, \mathbf{U}_n) \in \Phi_r)] \leq \delta^2$  for  $r = 1, 2$ . Therefore, we have

$$\begin{aligned} & \mathbf{E} \left[ \left| \mathbf{1}(\hat{p}_{d,\setminus i}(\mathbf{U}_i) > \frac{1}{2}) - \mathbf{1}(p_d(\mathbf{U}_i) > \frac{1}{2}) \right| \cdot \mathbf{1}\{\|\mathbf{U}_i - \mathbf{U}_j\| \leq 2r(\mathbf{U}_i, k)\} \right] \\ & \leq \mathbf{E} \left[ \mathbf{1}(\mathbf{U}_i \in \partial_\Delta) \cdot \mathbf{1}\{\|\mathbf{U}_i - \mathbf{U}_j\| \leq 2r(\mathbf{U}_i, k)\} \right] \\ & \quad + \mathbf{E} \left[ \mathbf{1}((\mathbf{U}_1, \dots, \mathbf{U}_n) \in \Phi_1) \right] + \mathbf{E} \left[ \mathbf{1}((\mathbf{U}_1, \dots, \mathbf{U}_n) \in \Phi_2) \right] \\ & = \mathbf{E} \left[ \mathbf{1}(\mathbf{U}_i \in \partial_\Delta) \cdot \mathbf{E}[\mathbf{1}\{\|\mathbf{U}_i - \mathbf{U}_j\| \leq 2r(\mathbf{U}_i, k)\} | \mathbf{U}_i] \right] + 2\delta^2 \end{aligned}$$

Next, we derive the property of  $r(\mathbf{U}, k)$ . By Lemma 6.4 in [Györfi et al. \(2006\)](#), we have

$$\mathbf{E}[r(\mathbf{U}, 1)^2] \leq \tilde{c}n^{-2/d}.$$

Split  $\mathbf{U}_1, \dots, \mathbf{U}_n$  into  $k+1$  segments such that the first  $k$  of them have  $\lfloor \frac{n}{k} \rfloor$  elements and rest in the last segment. Let  $r_j(\mathbf{U}, 1)$  be the distance from  $\mathbf{U}$  to the nearest point in  $j$ -th segment, then

$$\mathbf{E}[r(\mathbf{U}, k)^2] \leq \max_{j \in \{1, \dots, k\}} \mathbf{E}[r_j(\mathbf{U}, 1)^2] \leq \tilde{c} \lfloor \frac{n}{k} \rfloor^{-2/d}.$$

For any  $\epsilon > 0$ , let  $M = \sqrt{\tilde{c}/2\epsilon}$ , for all  $n \in \mathbb{N}$

$$\mathbf{P} \left( \frac{r(\mathbf{U}, k)}{(k/n)^{\frac{1}{d}}} > M \right) \leq \frac{\mathbf{E}[r(\mathbf{U}, k)^2] / (k/n)^{\frac{2}{d}}}{M^2} \leq \epsilon.$$

Thus,  $r(\mathbf{U}, k) = O_p((k/n)^{\frac{1}{d}})$  for all  $\mathbf{U} = (PD_0)^\top \mathbf{X}$ .

By (B3),

$$\mathbf{E}[\mathbf{1}\{\|\mathbf{U}_i - \mathbf{U}_j\| \leq 2r(\mathbf{U}_i, k)\} | \mathbf{U}_i] = F_d(B_{2r(\mathbf{U}_i, k)}(\mathbf{U}_i) | \mathbf{U}_i) \rightarrow C a_d 2^d r(\mathbf{U}_i, k)^d,$$

for some positive constant  $C$ . In the following proof,  $C$  will always denote positive constant but may be different in different places. Since  $d$  is bounded,

$$\mathbf{E}[\mathbf{1}\{\|\mathbf{U}_i - \mathbf{U}_j\| \leq 2r(\mathbf{U}_i, k)\} | \mathbf{U}_i] \leq A_2 r(\mathbf{U}_i, k)^d = O_p(k/n). \quad (\text{S.47})$$

Then, using equation (2.1) in [Samworth et al. \(2012\)](#) which can be derived from (B4), we have

$$\begin{aligned}\mathbf{E}[\mathbf{1}(\mathbf{U}_i \in \partial_\Delta)] &= F_d\left(\left\{\mathbf{u} \in W \left| \left| p_d(\mathbf{u}) - \frac{1}{2} \right| \leq \sqrt{\frac{1}{k} \log \frac{2}{\delta}} + A_1 \left( \frac{k}{2n} \right)^{1/d} \right\}\right) \\ &= O\left(\sqrt{\frac{1}{k} \log \frac{2}{\delta}} + A_1 \left( \frac{k}{2n} \right)^{1/d}\right).\end{aligned}\tag{S.48}$$

Let  $\delta = \frac{1}{k^2}$ , by (S.47) and (S.48)

$$\begin{aligned}&\mathbf{E}\left[\mathbf{1}(\mathbf{U}_i \in \partial_\Delta) \cdot \mathbf{E}[\mathbf{1}\{\|\mathbf{U}_i - \mathbf{U}_j\| \leq 2r(\mathbf{U}_i, k)\} | \mathbf{U}_i]\right] \\ &= \mathbf{E}\left[\mathbf{1}(\mathbf{U}_i \in \partial_\Delta) \cdot O_p(k/n)\right] = O\left(\frac{k^{1/2} \log k}{n} + \left(\frac{k}{2n}\right)^{\frac{d+1}{d}}\right).\end{aligned}$$

Thus, it follows that

$$II \leq O\left(\frac{k^{1/2} \log k}{n} + \left(\frac{k}{2n}\right)^{\frac{d+1}{d}}\right) + o((1/k)^2)\tag{S.49}$$

For a large enough  $n$ , substitute (S.46) and (S.49) into equation (S.45),

$$\begin{aligned}&n^{-2} \mathbf{E}\left[\sum_{i=1}^n \sum_{j=1}^n \{\hat{\xi}_i(d) - \xi_i(d)\} \{\hat{\xi}_j(d) - \xi_j(d)\}\right] \\ &\leq [\mathcal{R}_d(C_{n-1}^{kNN}) - \zeta_0(d)]^2 + O\left(\frac{k^{1/2} \log k}{n} + \left(\frac{k}{2n}\right)^{\frac{d+1}{d}}\right) + o((1/k)^2).\end{aligned}$$

Consequently,

$$\mathbf{Var}\left[\frac{1}{n} \sum_{i=1}^n \{\hat{\xi}_i(d) - \xi_i(d)\}\right] = O\left(\frac{k^{1/2} \log k}{n} + \left(\frac{k}{2n}\right)^{\frac{d+1}{d}}\right) + o((1/k)^2).$$

It is obvious that  $O\left(\frac{k^{1/2} \log k}{n}\right) = o((1/k)^2)$  when  $k = o(n^{2/5})$ ,  $O\left(\left(\frac{k}{2n}\right)^{\frac{d+1}{d}}\right) = o\left(\left(\frac{k}{n}\right)^{\frac{8}{d}}\right)$  when  $d > 7$  and  $O\left(\left(\frac{k}{2n}\right)^{\frac{d+1}{d}}\right) = o((1/k)^2)$  when  $d \leq 7$  and  $k = o(n^{4/11})$ . In conclusion, by (B5) and Chebyshev's inequality, for every  $\epsilon > 0$ ,

$$\begin{aligned}&\mathbf{P}\left(\frac{|n^{-1} \sum_{i=1}^n \{\hat{\xi}_i - \xi_i\} - [\mathcal{R}_d(C_{n-1}^{kNN}) - \alpha(d)]|}{k^{-1} + (k/n)^{4/d}} > \epsilon\right) \leq \epsilon^{-2} \mathbf{Var}\left(\frac{n^{-1} \sum_{i=1}^n \{\hat{\xi}_i - \xi_i\}}{k^{-1} + (k/n)^{4/d}}\right) \\ &= \epsilon^{-2} [k^{-1} + (k/n)^{4/d}]^{-2} \cdot \mathbf{Var}\left[\frac{1}{n} \sum_{i=1}^n \{\hat{\xi}_i(d) - \xi_i(d)\}\right] \\ &= \epsilon^{-2} [k^{-1} + (k/n)^{4/d}]^{-2} \cdot o((1/k)^2 + (k/n)^{8/d}) \rightarrow 0, \quad \text{as } n \rightarrow \infty.\end{aligned}$$

Thus, equation (S.44) is shown.

Using Theorem 1 in [Samworth et al. \(2012\)](#) with  $w_{ni} = k^{-1}$  for  $i \in \{1, \dots, k\}$ ,

$$\begin{aligned}\mathcal{R}_{d,n-1}^{kNN} - \zeta_0(d) &= \left\{ \zeta_1(d)k^{-1} + \zeta_2(d) \left( \frac{k}{n-1} \right)^{\frac{4}{d}} \right\} \{1 + o_p(1)\} \\ &= \left\{ \zeta_1(d)k^{-1} + \zeta_2(d)(k/n)^{\frac{4}{d}} \right\} \{1 + o_p(1)\}.\end{aligned}\tag{S.50}$$

Substitute (S.50) into (S.44), we have

$$\begin{aligned}& \frac{1}{n} \sum_{i=1}^n \left\{ \left| Y_i - \mathbf{1}(\hat{p}_{d,\setminus i}(\mathbf{U}_i) > \frac{1}{2}) \right| - \left| Y_i - \mathbf{1}(p_d(\mathbf{U}_i) > \frac{1}{2}) \right| \right\} \\ &= \left\{ \zeta_1(d)k^{-1} + \zeta_2(d)(k/n)^{\frac{4}{d}} \right\} \{1 + o_p(1)\} + o_p(k^{-1} + (k/n)^{\frac{4}{d}}) \\ &= \left\{ \zeta_1(d)k^{-1} + \zeta_2(d)(k/n)^{\frac{4}{d}} \right\} \{1 + o_p(1)\}\end{aligned}\tag{S.51}$$

In addition, by the central limit theorem, we have

$$\frac{1}{n} \sum_{i=1}^n \left| Y_i - \mathbf{1}(p_d(\mathbf{U}_i) > \frac{1}{2}) \right| = \zeta_0(d) + O_p(n^{-1/2}) = \zeta_0(d) + o_p(k^{-1}).\tag{S.52}$$

Thus, substitute (S.51) and (S.52) to (0.3),

$$CV(d, k) = \zeta_0(d) + \left\{ \zeta_1(d)k^{-1} + \zeta_2(d) \left( \frac{k}{n} \right)^{\frac{4}{d}} \right\} \{1 + o_p(1)\},$$

which completes the proof.  $\square$

**PROOF OF THEOREM 3.** By Lemma 7, the cross-validation (or prediction error)  $CV(d, k)$  is bigger than the first term  $\zeta_0(d)$ , which is the smallest risk one might be attained by any classifier based on  $\mathcal{S}_n^{PD}$ . Since HOPG method can order the projected directions in order with importance, we can suppose  $Y$  only depends on the first  $d_0$  directions of  $\mathbf{Z} = (z_1, \dots, z_m)$ , i.e.  $Y|z_1, \dots, z_m$  and  $Y|z_1, \dots, z_{d_0}$  have same distribution. Assuming  $d_0$  is the smallest true dimension, we first show that

$$\begin{aligned}\zeta_0(d_0) &< \zeta_0(d) \quad \text{for } 0 \leq d < d_0, \\ \zeta_0(d_0) &= \zeta_0(d) \quad \text{for } d_0 \leq d \leq m.\end{aligned}\tag{S.53}$$

By the definition of  $\zeta_0(d)$ , for any  $d$ -dimensional classifier  $C_d$ ,

$$\zeta_0(d) = \mathbf{P}\left\{ Y \neq \mathbf{1}(p_d(z_1, \dots, z_d) > \frac{1}{2}) \right\} = \min_{C_d} \mathbf{P}(Y \neq C_d(z_1, \dots, z_d)).$$

Hence, it is obvious that  $\zeta_0(d) \leq \zeta_0(d-1)$ . Since class label is either 0 or 1, we have

$$\begin{aligned}
& \zeta_0(d-1) - \zeta_0(d) \\
&= \mathbf{E}\{\mathbf{E}[\mathbf{1}(Y \neq \mathbf{1}(p_{d-1}(z_1, \dots, z_{d-1}) > \frac{1}{2}) - \mathbf{1}(Y \neq \mathbf{1}(p_d(z_1, \dots, z_d) > \frac{1}{2})) | (z_1, \dots, z_d)]\} \\
&= \mathbf{E}[p_d(z_1, \dots, z_d) \mathbf{1}(p_{d-1}(z_1, \dots, z_{d-1}) \leq \frac{1}{2}) + (1 - p_d(z_1, \dots, z_d)) \mathbf{1}(p_{d-1}(z_1, \dots, z_{d-1}) > \frac{1}{2}) \\
&\quad - p_d(z_1, \dots, z_d) \mathbf{1}(p_d(z_1, \dots, z_d) \leq \frac{1}{2}) - (1 - p_d(z_1, \dots, z_d)) \mathbf{1}(p_d(z_1, \dots, z_d) > \frac{1}{2})] \\
&= \mathbf{E}[[2p_d(z_1, \dots, z_d) - 1] \mathbf{1}\{\mathbf{1}(p_d(z_1, \dots, z_d) > \frac{1}{2}) \neq \mathbf{1}(p_{d-1}(z_1, \dots, z_{d-1}) > \frac{1}{2})\}],
\end{aligned}$$

where  $p_{d-1}(z_1, \dots, z_{d-1}) = \mathbf{E}[\mathbf{1}(Y = 1) | (z_1, \dots, z_{d-1})]$ . By assumption (B4), we can get  $\mathbf{P}(p_d(z_1, \dots, z_d) = \frac{1}{2}) = 0$  (it can be derived from equation (2.1) in [Samworth et al. \(2012\)](#)). Therefore, if  $\zeta_0(d-1) = \zeta_0(d)$ ,  $\mathbf{1}(p_d(z_1, \dots, z_d) > \frac{1}{2}) = \mathbf{1}(p_{d-1}(z_1, \dots, z_{d-1}) > \frac{1}{2})$  almost surely. Specifically, if  $\zeta_0(d_0) = \zeta_0(d_0 - 1)$ , we have almost surely

$$\mathbf{1}(p_{d_0}(z_1, \dots, z_{d_0}) > \frac{1}{2}) = \mathbf{1}(p_{d_0-1}(z_1, \dots, z_{d_0-1}) > \frac{1}{2}).$$

This contradicts the definition of  $d_0$  (smallest true dimension). So  $\zeta_0(d_0) < \zeta_0(d_0 - 1) \leq \zeta_0(d)$  for  $d < d_0$ .

Obviously, because class  $Y$  only depends on the first  $d_0 (< m)$  features of  $Z$ , for  $d > d_0$ ,

$$p_d(z_1, \dots, z_d) = p_{d-1}(z_1, \dots, z_{d-1}) \quad \text{a.s.}$$

which leads to  $\zeta_0(d_0) = \zeta_0(d_0 + 1) = \dots = \zeta_0(m)$ . Hence, we can get (S.53).

Then, using the asymptotic expansion in Lemma 7, Theorem 4 can be shown by the following two parts,

$$(a) \text{ for } 1 \leq d < d_0, \lim_{n \rightarrow \infty} \{P(\hat{d} = d)\} = 0;$$

$$(b) \text{ for } d_0 < d \leq m, \lim_{n \rightarrow \infty} \{P(\hat{d} = d)\} = 0.$$

According to the proof of Lemma 7, it is obvious that  $CV(d, k) - \zeta_0(d) = o_p(1)$  as  $n \rightarrow \infty$ . Thus, for every  $k$  and  $1 \leq d < d_0$ , as  $n \rightarrow \infty$ ,

$$\frac{CV(d, k)}{CV(d_0, k)} \rightarrow \frac{\zeta_0(d) + o_p(1)}{\zeta_0(d_0) + o_p(1)} > 1, \quad \text{in probability.}$$

Then, for every  $k$ ,

$$\begin{aligned}
& \mathbf{P}\{CV(d, k) \leq CV(d', k), 1 \leq d' \leq m\} \leq \mathbf{P}\{CV(d, k) \leq CV(d_0, k)\} \\
&= \mathbf{P}\left(\frac{CV(d, k)}{CV(d_0, k)} \leq 1\right) = \mathbf{P}\left(\frac{\zeta_0(d) + o_p(1)}{\zeta_0(d_0) + o_p(1)} \leq 1\right) \rightarrow 0 \quad \text{as } n \rightarrow \infty.
\end{aligned}$$

Therefore, it follows that

$$\lim_{n \rightarrow \infty} \{\mathbf{P}(\hat{d} = d)\} = 0 \quad \text{for } 0 \leq d < d_0,$$

which proves part (a).

By Theorem 3, the optimal choice of  $k$  can be derived as

$$k_{opt} = \left\lfloor \left( \frac{\zeta_1(d)}{\zeta_2(d)} \times \frac{d}{4} \right)^{d/(d+4)} n^{4/(d+4)} \right\rfloor.$$

It is obvious that  $k_{opt}$  satisfies the restriction of  $k$  in (A5) when  $d > 7$ . Then, we have

$$\begin{aligned} CV(d, k_{opt}) &= \zeta_0(d) + \left\{ \zeta_1(d) \left( \frac{\zeta_1(d)}{\zeta_2(d)} \cdot \frac{d}{4} \right)^{\frac{-d}{d+4}} n^{\frac{-4}{d+4}} + \zeta_2(d) \left( \frac{\zeta_1(d)}{\zeta_2(d)} \cdot \frac{d}{4} \right)^{\frac{4}{d+4}} n^{\frac{-4}{d+4}} \right\} \{1 + o_p(1)\} \\ &= \zeta_0(d) + \left\{ \left[ \left( \frac{d}{4} \right)^{\frac{-d}{d+4}} + \left( \frac{d}{4} \right)^{\frac{4}{d+4}} \right] \zeta_1(d)^{\frac{4}{d+4}} \zeta_2(d)^{\frac{d}{d+4}} n^{\frac{-4}{d+4}} \right\} \{1 + o_p(1)\} \\ &= \zeta_0(d) + \beta(d) n^{\frac{-4}{d+4}} + o_p(n^{\frac{-4}{d+4}}), \end{aligned} \tag{S.54}$$

where  $\beta(d)$  is a constant depending on  $d$ .

For part (b), let  $d > d_0$ , it follows from (S.53) that  $\zeta_0(d) = \zeta_0(d_0)$ . Since,  $d$  is bounded, we can assume  $M$  is its upper bound. When  $7 < d_0 < d \leq \min\{m, M\}$ , by equation (S.54) and  $\zeta_0(d) = \zeta_0(d_0)$ , we have

$$\begin{aligned} \min_k CV(d, k) - \min_k CV(d_0, k) &= \{\beta(d) n^{\frac{-4}{d+4}} + o_p(n^{\frac{-4}{d+4}})\} - \{\beta(d_0) n^{\frac{-4}{d_0+4}} + o_p(n^{\frac{-4}{d_0+4}})\} \\ &= n^{\frac{-4}{d+4}} \{\beta(d) - \beta(d_0) n^{\frac{4}{d+4} - \frac{4}{d_0+4}}\} + o_p(n^{\frac{-4}{d+4}}) \\ &\sim n^{\frac{-4}{d+4}} \beta(d) + o_p(n^{\frac{-4}{d+4}}) \quad \text{as } n \rightarrow \infty. \end{aligned}$$

Since  $\beta(d) > 0$ , for  $7 < d_0 < d \leq \min\{m, M\}$ ,

$$\begin{aligned} \lim_{n \rightarrow \infty} \{\mathbf{P}(\hat{d} = d)\} &= \lim_{n \rightarrow \infty} \mathbf{P}\{\min_k CV(d, k) \leq \min_k CV(d', k), 1 \leq d' \leq p\} \\ &\leq \lim_{n \rightarrow \infty} \mathbf{P}\{\min_k CV(d, k) \leq \min_k CV(d_0, k)\} \\ &= \lim_{n \rightarrow \infty} \mathbf{P}\{n^{\frac{4}{d+4}} [\min_k CV(d, k) - \min_k CV(d_0, k)] \leq 0\} \\ &= \mathbf{P}\{\beta(d) + o_p(1) \leq 0\} = 0. \end{aligned}$$

When  $d_0 < d \leq 7$ , for ever  $k$ ,

$$\frac{CV(d, k)}{CV(d_0, k)} \rightarrow \frac{\zeta_0(d) + o_p(1)}{\zeta_0(d_0) + o_p(1)} \rightarrow_p 1, \quad \text{as } n \rightarrow \infty.$$

This formula means that  $CV(d, k) = CV(d_0, k)$  in probability as  $n \rightarrow \infty$ . Since  $\hat{d}$  is the smallest minimizer of  $CV(d, k)$ ,  $\lim_{n \rightarrow \infty} \{\mathbf{P}(\hat{d} = d)\} = 0$  in this situation. Hence, we complete the proof of part (b).

Consequently,

$$\begin{aligned} \lim_{n \rightarrow \infty} \{\mathbf{P}(\hat{d} = d_0)\} &= \lim_{n \rightarrow \infty} \{1 - \mathbf{P}(\hat{d} \neq d_0)\} \\ &= \lim_{n \rightarrow \infty} \left\{1 - \sum_{1 \leq d < d_0} \mathbf{P}(\hat{d} = d) - \sum_{d_0 < d \leq \min\{m, M\}} \mathbf{P}(\hat{d} = d)\right\} = 1. \end{aligned}$$

We complete the proof.  $\square$

PROOF OF THEOREM 4. First of all, using HOPG estimation, we have by Theorem 2

$$|\hat{D}\hat{D}^\top - D_0 D_0^\top| \rightarrow 0, \quad \text{in probability.}$$

Then,

$$\begin{aligned} &|\mathbf{E}(Y|D_0^\top P^\top \mathbf{X} = D_0^\top P^\top \mathbf{x}) - \mathbf{E}(Y|\hat{D}^\top P^\top \mathbf{X} = \hat{D}^\top P^\top \mathbf{x})| \\ &= |\mathbf{E}(Y|D_0 D_0^\top P^\top \mathbf{X} = D_0 D_0^\top P^\top \mathbf{x}) - \mathbf{E}(Y|\hat{D} \hat{D}^\top P^\top \mathbf{X} = \hat{D} \hat{D}^\top P^\top \mathbf{x})| \\ &\leq |\mathbf{E}(Y|D_0 D_0^\top P^\top \mathbf{X} = D_0 D_0^\top P^\top \mathbf{x}) - \mathbf{E}(Y|D_0 D_0^\top P^\top \mathbf{X} = \hat{D} \hat{D}^\top P^\top \mathbf{x})| \\ &\quad + |\mathbf{E}(Y|D_0 D_0^\top P^\top \mathbf{X} = \hat{D} \hat{D}^\top P^\top \mathbf{x}) - \mathbf{E}(Y|\hat{D} \hat{D}^\top P^\top \mathbf{X} = \hat{D} \hat{D}^\top P^\top \mathbf{x})| \\ &\rightarrow 0. \end{aligned} \tag{S.55}$$

By definition of  $D_0$  and  $Y \in \{0, 1\}$ ,

$$p(\mathbf{x}) = \mathbf{P}(Y = 1|P^\top \mathbf{X} = P^\top \mathbf{x}) = \mathbf{E}(Y|P^\top \mathbf{X} = P^\top \mathbf{x}) = \mathbf{E}(Y|D_0^\top P^\top \mathbf{X} = D_0^\top P^\top \mathbf{x}). \tag{S.56}$$

In addition, by the consistency of kNN regression (e.g. [Devroye et al. \(1994\)](#)),

$$\hat{p}(\mathbf{x}) \rightarrow \mathbf{P}(Y = 1|\hat{D}^\top P^\top \mathbf{X} = \hat{D}^\top P^\top \mathbf{x}) = \mathbf{E}(Y|\hat{D}^\top P^\top \mathbf{X} = \hat{D}^\top P^\top \mathbf{x}) \quad \text{a.s.} \tag{S.57}$$

Combine (S.55), (S.56) and (S.57), we have

$$\lim_{n \rightarrow \infty} \hat{p}(\mathbf{x}) \rightarrow p(\mathbf{x}) \quad \text{in probability.}$$

We complete the proof.  $\square$

In the multi-categorical cases, Theorem 3 and Theorem 4 hold with assumptions (B1), (B2'), (B3), (B4'), (B5) and (B6) given in the Appendix. Lemma 7 is still true by replacing constants  $\zeta_1$  and  $\zeta_2$  by  $\tilde{\zeta}_1 = \sum_{\ell_1 \neq \ell_2} \zeta_{1, \ell_1, \ell_2}$  and  $\tilde{\zeta}_2 = \sum_{\ell_1 \neq \ell_2} \zeta_{2, \ell_1, \ell_2}$  (c.f. [Samworth et al. \(2012\)](#)). The definitions of  $\zeta_{1, \ell_1, \ell_2}$  and  $\zeta_{2, \ell_1, \ell_2}$  are

$$\tilde{\zeta}_{1, \ell_1, \ell_2}(d) = \int_{\Omega_{\ell_1, \ell_2}} \frac{f_d(\mathbf{u}_0)}{p_d^{\ell_1, \ell_2}(\mathbf{u}_0)(1 - p_d^{\ell_1, \ell_2}(\mathbf{u}_0))\|\dot{p}_d^{\ell_1, \ell_2}(\mathbf{u}_0)\|} dVol^{d-1}(\mathbf{u}_0)$$

and

$$\tilde{\zeta}_{2,\ell_1,\ell_2}(d) = \int_{\Omega_{\ell_1,\ell_2}} \frac{f_d(\mathbf{u}_0)}{\|\dot{p}_d^{\ell_1,\ell_2}(\mathbf{u}_0)\|} a_{\ell_1,\ell_2}(\mathbf{u}_0)^2 dVol^{d-1}(\mathbf{u}_0),$$

where  $p_d^{\ell_1,\ell_2}(\mathbf{u}_0)$  denotes the common value that  $p_d^{\ell_1}$  and  $p_d^{\ell_2}$  take at  $\mathbf{u}_0 \in \Omega_{\ell_1,\ell_2}$ , and  $a_{\ell_1,\ell_2}(\cdot)$  can be obtained by changing  $p_d(\cdot)$  to  $p_d^{\ell_1,\ell_2}(\cdot)$  in the definition of  $a(\cdot)$ .

## References

- Chaudhuri, K. and Dasgupta, S. (2014). Rates of convergence for nearest neighbor classification. In *Advances in Neural Information Processing Systems*, pages 3437–3445.
- Devroye, L., Györfi, L., Krzyzak, A., and Lugosi, G. (1994). On the strong universal consistency of nearest neighbor regression function estimates. *The Annals of Statistics*, pages 1371–1385.
- Fan, J. and Yao, Q. (2008). *Nonlinear time series: nonparametric and parametric methods*. Springer Science & Business Media.
- Györfi, L., Kohler, M., Krzyzak, A., and Walk, H. (2006). *A distribution-free theory of nonparametric regression*. Springer Science & Business Media.
- Samworth, R. J. et al. (2012). Optimal weighted nearest neighbour classifiers. *The Annals of Statistics*, 40(5):2733–2763.
- Székely, G. J., Rizzo, M. L., Bakirov, N. K., et al. (2007). Measuring and testing dependence by correlation of distances. *The annals of statistics*, 35(6):2769–2794.
